1 **Antibodies to *Aedes aegypti* D7L salivary proteins as a new**  
2 **serological tool to estimate human exposure to *Aedes* mosquitoes.**

3

4 Sophana Chea<sup>1†</sup>, Laura Willen<sup>2†</sup>, Sreynik Nhek<sup>1</sup>, Piseth Ly<sup>1</sup>, Kristina Tang<sup>2</sup>, James  
5 Oristian<sup>2</sup>, Roberto Salas-Carrillo<sup>2</sup>, Aiyana Ponce<sup>2</sup>, Paola Carolina Valenzuela Leon<sup>2</sup>,  
6 Dara Kong<sup>1</sup>, Sokna Ly<sup>2</sup>, Ratanak Sath<sup>2</sup>, Chanthap Lon<sup>1,2</sup>, Rithea Leang<sup>3,4</sup>, Rekol  
7 Huy<sup>3</sup>, Christina Yek<sup>1,2</sup>, Jesus G. Valenzuela<sup>2</sup>, Eric Calvo<sup>2</sup>, Jessica E. Manning<sup>1,2</sup>,  
8 Fabiano Oliveira<sup>1,2\*</sup>.

9

10 <sup>1</sup> International Center of Excellence in Research, National Institute of Allergy and  
11 Infectious Diseases, Phnom Penh, Cambodia

12 <sup>2</sup> Laboratory of Malaria and Vector Research, National Institute of Allergy and  
13 Infectious Diseases, National Institutes of Health, Bethesda, MD, USA

14 <sup>3</sup> National Center for Parasitology, Entomology, and Malaria Control, Ministry of  
15 Health, Phnom Penh, Cambodia

16 <sup>4</sup> National Dengue Control Program, Ministry of Health, Phnom Penh, Cambodia

17

18

19 Sophana Chea<sup>1†</sup> and Laura Willen<sup>2†</sup>: These authors contributed equally to this work  
20 and share first authorship.

21

22

23 \* **Correspondence:** Fabiano Oliveira, loliveira@nih.gov

24

25

26 **Keywords:** *Aedes*; *Aedes aegypti*; exposure marker, ELISA, dengue, biomarker,  
27 Cambodia; mosquito saliva.

28

29

30

## 31 1 Abstract

32

33 **Introduction:** *Aedes spp.* are the most prolific mosquito vectors in the world. Found  
34 on every continent, they can effectively transmit various arboviruses, including the  
35 dengue virus which continues to cause outbreaks worldwide and is spreading into  
36 previously non-endemic areas. The lack of widely available dengue vaccines  
37 accentuates the importance of targeted vector control strategies to reduce the  
38 dengue burden. High-throughput sensitive tools to estimate human-mosquito contact  
39 and evaluate vector control interventions are lacking. We propose a novel serological  
40 tool that allows rapid screening of large human cohorts for exposure to potentially  
41 infectious mosquitoes and effective targeting of vector control.

42 **Methods:** We tested 563 serum samples from a longitudinal pediatric cohort study  
43 previously conducted in Cambodia. Children enrolled in the study were dengue-  
44 naïve at baseline and were followed biannually for dengue incidence for two years.  
45 We used Western blotting and enzyme-linked immunosorbent assays to identify the  
46 most immunogenic *Aedes aegypti* salivary proteins and measure total anti-*Ae.*  
47 *Aegypti* IgG.

48 **Results:** We found a strong correlation ( $r_s=0.86$ ) between the combined IgG  
49 responses against AeD7L1 and AeD7L2 recombinant proteins and those to whole  
50 salivary gland homogenate. We observed seasonal fluctuations of AeD7L1+2 IgG  
51 responses, corresponding to *Aedes spp.* abundance in the region, and no cross-  
52 reactivity with *Culex quinquefasciatus* and *Anopheles dirus* mosquitoes. The  
53 baseline median AeD7L1+2 IgG responses for young children were higher in those  
54 who developed asymptomatic dengue versus those who developed symptomatic  
55 dengue.

56 **Conclusion:** The IgG response against AeD7L1+2 recombinant proteins is a highly  
57 sensitive and *Aedes* specific marker of human exposure to *Aedes* bites that can  
58 facilitate standardization of future serosurveys and epidemiological studies by its  
59 ability to provide a robust estimation of human-mosquito contact in a high-throughput  
60 fashion.

## 61 **2 Introduction**

62

63 Dengue is the most prevalent arboviral disease worldwide, with the greatest burden  
64 in tropical and sub-tropical regions (1, 2). Half the world's population is at risk of  
65 contracting dengue, including 1.3 billion people living in ten dengue-endemic  
66 countries of the South-East Asian region (3). From 2015 to 2019, dengue cases in  
67 the region increased by 46% culminating in a major epidemic in 2019 that led to the  
68 highest number of annual global cases (>5.2 million) ever to be reported in the same  
69 year (4).

70 Currently, existing vaccines remain selectively available; thus, prevention and control  
71 of dengue heavily rely on effective vector control measures targeted towards *Aedes*  
72 mosquitoes. The efficacy of these vector control methods is currently evaluated  
73 using expensive and labor-intensive insect trapping that may not reflect true human  
74 exposure to mosquito bites. An alternative approach exploits the human humoral  
75 immune responses against the vector's salivary components that are injected during  
76 a bloodmeal. Salivary proteins of several hematophagous arthropods were  
77 previously identified and shown to facilitate blood feeding by limiting the host's  
78 vasoconstriction, inhibiting coagulation processes, and suppressing pain receptors  
79 (5). Saliva of *Aedes aegypti* female mosquitoes contains about 100 abundant  
80 salivary proteins (6, 7) that are implicated in enhanced viral dissemination and  
81 increased pathogenesis of viral infections (8).

82 IgG responses against whole salivary gland homogenate of *Aedes* mosquitoes  
83 (SGH) correlate with the intensity of mosquito bite exposure (9), and were previously  
84 proposed as a marker of human exposure to *Aedes* mosquitoes (10-12). Since then,  
85 researchers established a repertoire of promising recombinant salivary antigens to  
86 bypass the potential cross-reactivity of SGH with other vector species and to  
87 facilitate the use of biomarkers of *Aedes* exposure in large-scale cohort studies (13),  
88 with the Nterm-34kDa peptide biomarker being the most studied (13, 14).

89 Interestingly, none of these studies assessed how well the antibody (Ab) responses  
90 against *Ae. aegypti* recombinant proteins correlate with those against whole saliva or  
91 SGH, the reference standard for *Aedes* exposure. Ab responses against whole SGH  
92 and several recombinant *Ae. aegypti* salivary proteins have also been implicated in  
93 associations with disease outcome(15, 16). IgG reactivity to *Ae. aegypti* salivary

94 proteins were higher in DENV positive patients than in uninfected patients (9, 15,  
95 17). Conversely, Ab responses against the *Ae. aegypti* D7 proteins, involved in the  
96 scavenging of biogenic amines and cysteinyl leukotrienes and, thus, potentially  
97 involved in preventing the host's inflammatory response, were higher in DENV  
98 positive and febrile patients as opposed to non-febrile patients. In the present study,  
99 we identified salivary biomarkers of *Ae. aegypti* exposure that can replace the use of  
100 mosquito saliva or SGH and subsequently investigate if a relationship exists between  
101 these surrogate biomarkers of exposure and clinical outcomes in dengue infected  
102 patients in a longitudinal pediatric cohort in Cambodia (18).

103

104

### 105 **3 Results**

106

#### 107 **3.1 Identification of immunogenic *Aedes aegypti* salivary proteins in a 108 Cambodian pediatric population.**

109

110 We used Western blot to measure the recognition of *Ae. aegypti* salivary proteins by  
111 IgG present in the serum of our study population. We observed sera reactivity in the  
112 *Ae. aegypti* SGH molecular weight range of 28 kDa to 98 kDa (Fig 1A). Cambodian  
113 sera reactivity increased on par with anti-SGH ELISA OD values (Fig. 1A,  
114 Supplementary Fig. 1). Using a digital detection system, we identified reactive  
115 protein bands with approximate molecular weights of 80 kDa, 62 kDa, 35 kDa and 30  
116 kDa and accounting for 72 %, 88 %, 85 %, and 82 % of the total seropositivity,  
117 respectively. We next produced and screened 18 *Ae. aegypti* recombinant salivary  
118 proteins by Western blot using a pool of *Ae. aegypti* SGH reactive sera from our  
119 cohort (n=10) (Fig. 1C). We identified five of the 18 *Ae. aegypti* recombinant salivary  
120 proteins as reactive, corresponding to AeApyrase, AeD7L1, AeD7L2, NIH-23, and  
121 NIH-27 (Table 1, Supplementary Fig. 2). We scaled up production of these five *Ae.*  
122 *aegypti* salivary recombinant proteins, verified their purity by Coomassie G-250  
123 staining (Fig. 1B) and tested their reactivity to the pooled sera (Fig. 1C). Importantly,  
124 sera from healthy U.S. blood donors who were non-reactive on an *Ae. aegypti* SGH  
125 ELISA, also did not react to any of the tested recombinant proteins (Fig. 1C).

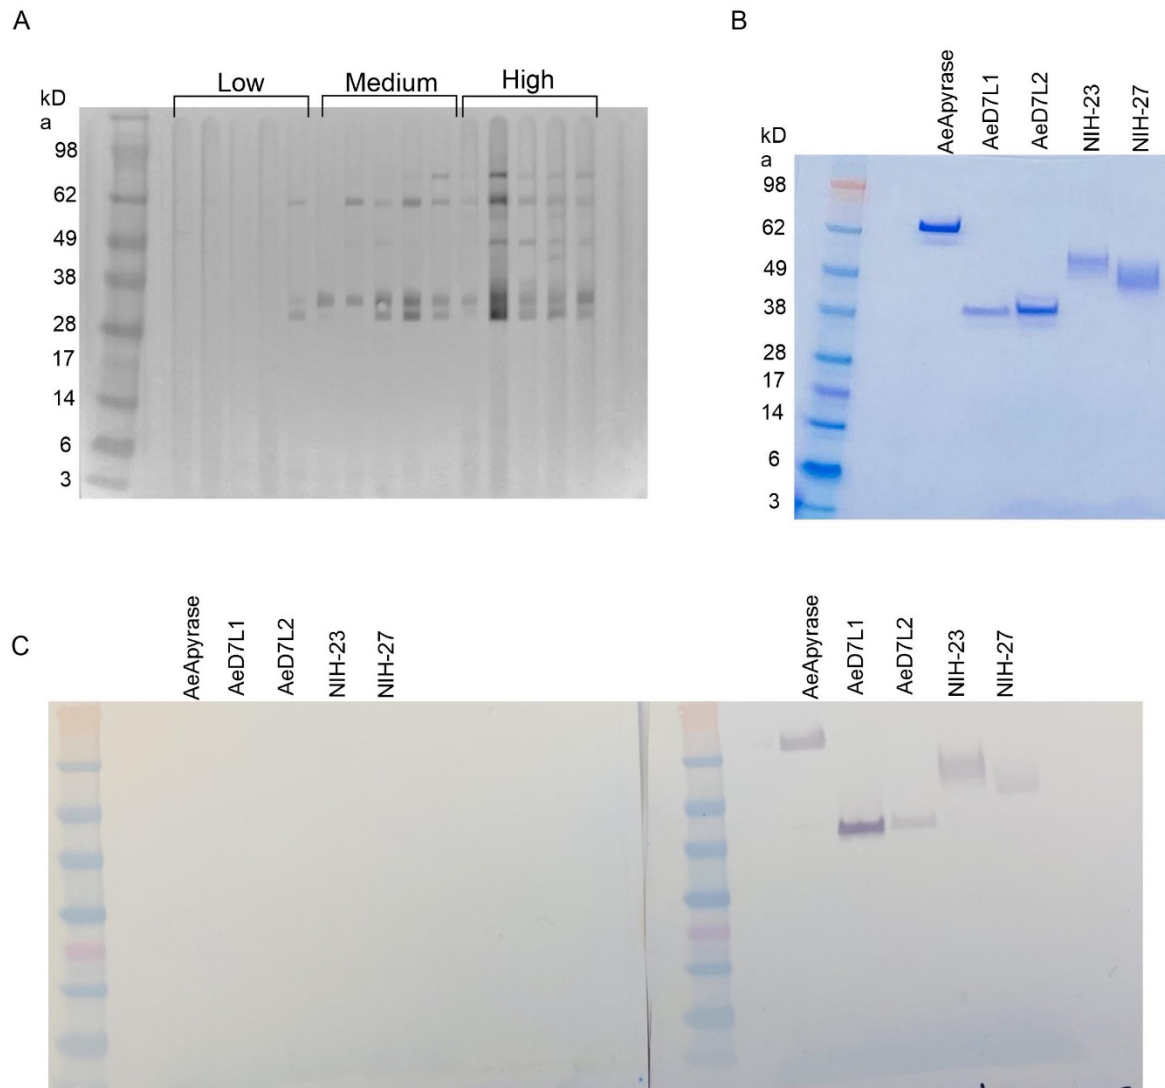

126  
127 **Figure 1. Sera from children living in dengue-endemic areas in Kampong Speu**  
128 **province, Cambodia recognize native SGH from *Ae. aegypti*.** (A) Western blot displaying  
129 reactivity of Cambodian sera samples organized by increasing *Ae. aegypti* SGH ELISA OD  
130 values. (B) Coomassie blue stained SDS-PAGE of the five selected recombinant proteins  
131 (AeD7L2, AeD7L1, NIH-27, NIH-23, and AeApyrase). (C) Western blot with AeD7L2,  
132 AeD7L1, NIH-27, NIH-23, and AeApyrase against a pool of negative (left) and positive (right)  
133 sera.

134

135

|           | <b>Protein name</b> | <b>Molecular weight (kda)</b> | <b>Accession number</b> | <b>Sera reactivity</b> | <b>Annotation</b>                                                                      |
|-----------|---------------------|-------------------------------|-------------------------|------------------------|----------------------------------------------------------------------------------------|
| <b>1</b>  | NIH435-36           | 20.05                         | ABF18174                | No                     | Putative 14.5 kDa salivary protein (19)                                                |
| <b>2</b>  | NIH435-8            | 20.6                          | AAL76029                | No                     | Putative C-type lectin (20)                                                            |
| <b>3</b>  | NIH435-4            | 21                            | ABF18046                | No                     | Proline rich salivary secreted peptide (19)                                            |
| <b>4</b>  | NIH435-29           | 21.16                         | AAL76036                | No                     | Putative 18.2 kDa secreted protein (20)                                                |
| <b>5</b>  | AeD7S               | 21.25                         | ABF18082                | No                     | Putative odorant binding protein (19)                                                  |
| <b>6</b>  | Aegyptin            | 30                            | CAX36783                | No                     | Binds collagen and inhibits platelet aggregation and adhesion (21)                     |
| <b>7</b>  | NIH435-32           | 36.4                          | ABF18025                | No                     | Angiopoietin-like protein variant, Fibrinogen-related domains (FREds) (19)             |
| <b>8</b>  | NIH435-27           | 36.7                          | AAL76019                | Yes                    | Putative sticky protein, Angiopoietin related protein, Fibrinogen-related domains (20) |
| <b>9</b>  | AeD7L1              | 37                            | AAL16049                | Yes                    | Binds biogenic amines and eicosanoids (22)                                             |
| <b>10</b> | AeD7L2              | 37                            | AAA29347                | Yes                    | Binds biogenic amines and eicosanoids (22)                                             |
| <b>11</b> | NIH435-31           | 38.72                         | ABF18017                | No                     | Putative 34 kDa family secreted salivary protein (19)                                  |
| <b>12</b> | NIH435-24           | 39.13                         | XP_001657055            | No                     | Uncharacterized protein (23)                                                           |
| <b>13</b> | NIH435-16           | 20.05                         | XP_001651977            | No                     | Probable uridine nucleosidase 1, Nucleoside hydrolases (23)                            |
| <b>14</b> | NIH435-23           | 20.6                          | XP_001656512            | Yes                    | Serine protease inhibitors (Serpin) family, clotting inhibitor (24, 25)                |
| <b>15</b> | NIH435-19           | 21                            | EAT46066                | No                     | Serine protease inhibitors (Serpin) family, clotting inhibitor (24)                    |
| <b>16</b> | NIH435-6            | 21.16                         | ABF18028                | No                     | Salivary anti FXa serpin (19)                                                          |
| <b>17</b> | NIH435-21           | 21.25                         | XP_001663083            | No                     | Cysteine-rich secretory proteins, antigen 5, pathogenesis-related 1 proteins (23)      |
| <b>18</b> | AeApyrase           | 61.36                         | AAC37218.1              | Yes                    | Inhibiting ADP-dependent platelet aggregation (26)                                     |

136

137 **Table 1.** Name, molecular weight, accession number, serum reactivity, and function of the  
 138 17 recombinant proteins used for the immunoreactivity screening against *Ae. aegypti*  
 139 salivary gland homogenate.

140

141  
142  
143  
144  
145  
146  
147  
148  
149  
150  
151  
152  
153  
154  
155  
156  
157

### 3.2 The combined antibody responses against *Aedes aegypti* D7L1 and D7L2 salivary proteins is a valid surrogate for antibodies against *Ae. aegypti* SGH.

We tested a random subset of 18 Cambodian children sampled at seven consecutive visits during the dry and wet seasons from 2018 to 2021 on an ELISA assay for Abs against the selected recombinant proteins or against SGH (Fig. 2A). We achieved a high correlation between SGH and AeD7L1+2 ( $r = 0.91$ ,  $r_s = 0.92$ ), AeD7L1 ( $r = 0.82$ ,  $r_s = 0.82$ ), and AeD7L2 ( $r = 0.76$ ,  $r_s = 0.82$ ), alone or when combined with AeApyrase, AeNIH-27 or AeNIH-23 (Fig. 2). No significant correlation was observed between Abs against SGH and a negative control antigen (Bovine Serum Albumin, BSA) ( $r = 0.17$  ( $P = 0.05$ ),  $r_s = 0.15$  ( $P = 0.1$ )). We selected the combination of AeD7L1+2 as the optimal and most parsimonious candidate for further analyses. All  $P$  values and confidence intervals are displayed in Supplementary Table 1.

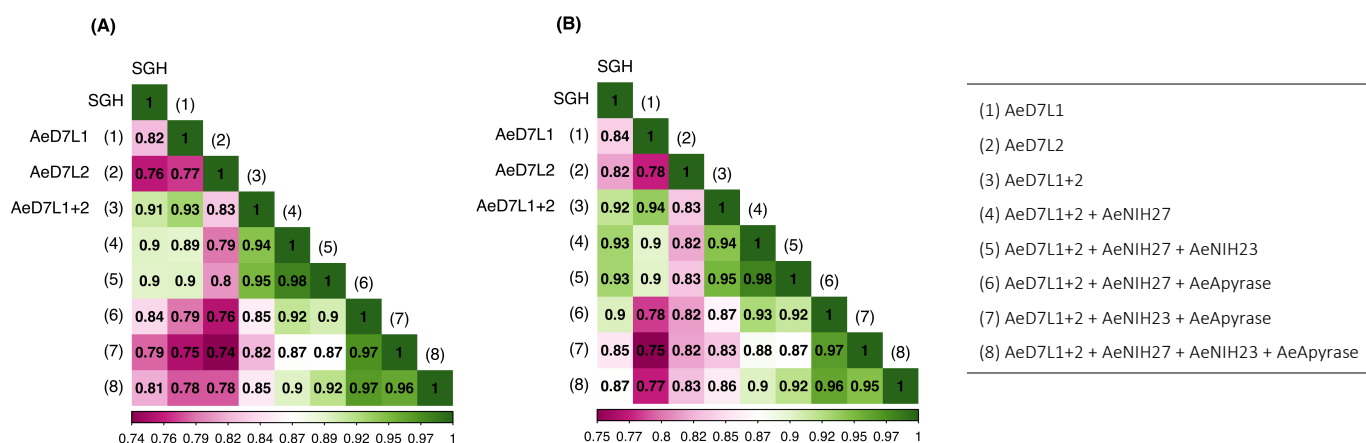

158  
159  
160  
161  
162

**Figure 2.** Heat map showing the Pearson (A) and Spearman (B) correlation coefficients ( $r$  and  $r_s$ , respectively) between antibody responses against SGH and against AeD7L1+2, AeD7L1, or AeD7L2, alone or when combined with AeApyrase, AeNIH-27 or AeNIH-23.

163 **3.3 Antibody responses show a seasonal fluctuation that is most**  
164 **pronounced for AeD7L1 and AeD7L1+2.**

165  
166 Wet and dry seasons in Cambodia reflect the seasonal abundance of *Aedes spp.*  
167 We detected significant differences in anti-SGH, anti-AeD7L1, anti-AeD7L2, and  
168 anti-AeD7L1+2 IgG levels between wet and dry seasons for the same subset of 18  
169 Cambodian children who were sampled at seven consecutive visits (Fig. 3). More so,  
170 the seasonal fluctuation for AeD7L1 and the composite marker AeD7L1+L2 was  
171 stronger (moderate effect size, Kendall W = 0.33 and 0.30, respectively) than that for  
172 SGH or AeD7L2 (small effect size, Kendall W=0.17 and 0.19, respectively). No  
173 significant differences were observed for the Ab responses against BSA during the  
174 wet and dry seasons (Supplementary Fig. 3).  
175

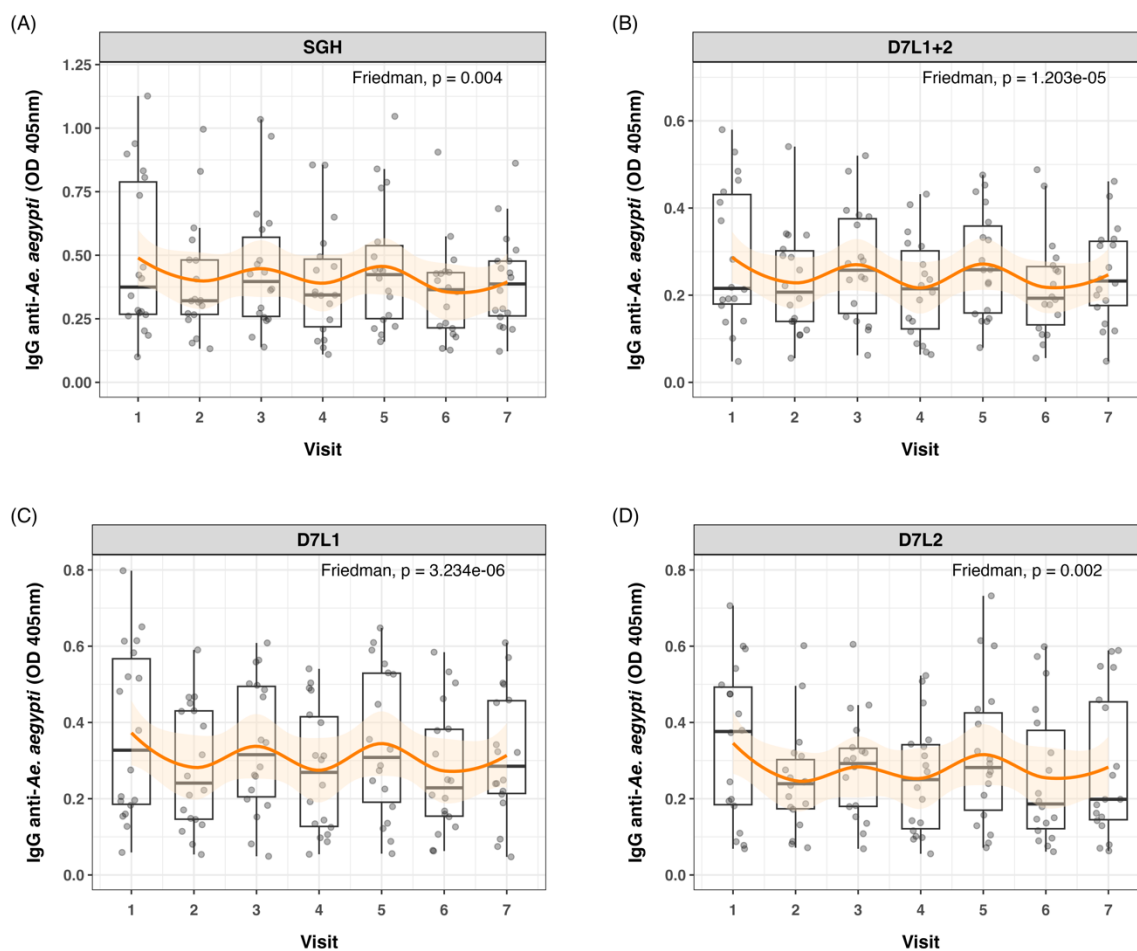

176  
177 **Figure 3. Seasonal variation in anti-*Ae. aegypti* IgG levels.** Dot and boxplots of  
178 standardized ELISA optical density (OD) values of 18 individuals tested at seven different  
179 time points (Visit 1 to 7) for IgG against (A) SGH, (B) AeD7L1+2, (C) AeD7L1, and (D)



180 AeD7L2. Visit 1, 3, 5, and 7 took place in wet seasons from 2018 to 2021, the other visits  
181 took place during the dry seasons. The solid black horizontal line within the boxplots is the  
182 median; the lower and upper borders are, respectively, the 1st and 3rd quartiles; the vertical  
183 bars indicate the minimum and maximum values. The orange smoothed fitted curves  
184 represent a loess regression (span  $\alpha = 0.45$ ) with 95% confidence intervals (shaded area).  
185 Results of the overall Friedman rank test are provided.

186

### 187 **3.4 Children who developed asymptomatic dengue had higher anti-** 188 **AeD7L1+2 antibody titers at baseline than those who developed** 189 **symptomatic dengue.**

190

191 Sera samples of all children naïve at baseline (n=563) were tested for the response  
192 against AeD7L1+2 to assess associations with disease outcome (i.e., no dengue  
193 infection, asymptomatic dengue, and symptomatic dengue). Correlation coefficients  
194 between *Ae. aegypti* SGH and the AeD7L1+2 recombinant proteins remained strong  
195 for the full cohort ( $r=0.85$ ,  $r_s=0.86$ ). To investigate associations with anti-*Aedes* Ab  
196 levels at baseline and disease, we first fitted Cox PH models that consider time to  
197 any dengue infection. We did not observe any significant differential risk for dengue  
198 between children with high or low baseline Ab levels, for neither SGH, nor AeD7L1+2  
199 (Supplementary Table 2 and 3). We then tested the distribution of baseline Ab  
200 responses to SGH and AeD7L1+2 with age and disease outcome group. Accounting  
201 for age, disease outcome, and an age x disease outcome interaction term,  
202 multivariate models revealed that overall Ab responses decreased with increasing  
203 age for both SGH and D7L1+2 (Fig. 4A). However, the Ab response of children who  
204 developed symptomatic dengue increased with age compared to children who  
205 developed asymptomatic dengue (test of age  $\times$  disease outcome interaction  
206 term (Fig. 4A). Marginal effect plots of the age x disease outcome interaction from  
207 the GLM regression indicate a cross-over in baseline Ab responses at six years old  
208 (Fig. 4B). Indeed, when comparing median baseline Ab levels between disease  
209 outcomes, a significant difference existed among children younger than six years of  
210 age who developed asymptomatic vs. symptomatic dengue, for both SGH and  
211 AeD7L1+2 ( $P = 0.046$  and  $P = 0.022$ , respectively, Fig. 4C). Children older than six  
212 years did not exhibit differences in baseline median Ab responses between disease  
213 outcome groups (Fig. 4C).

214

215

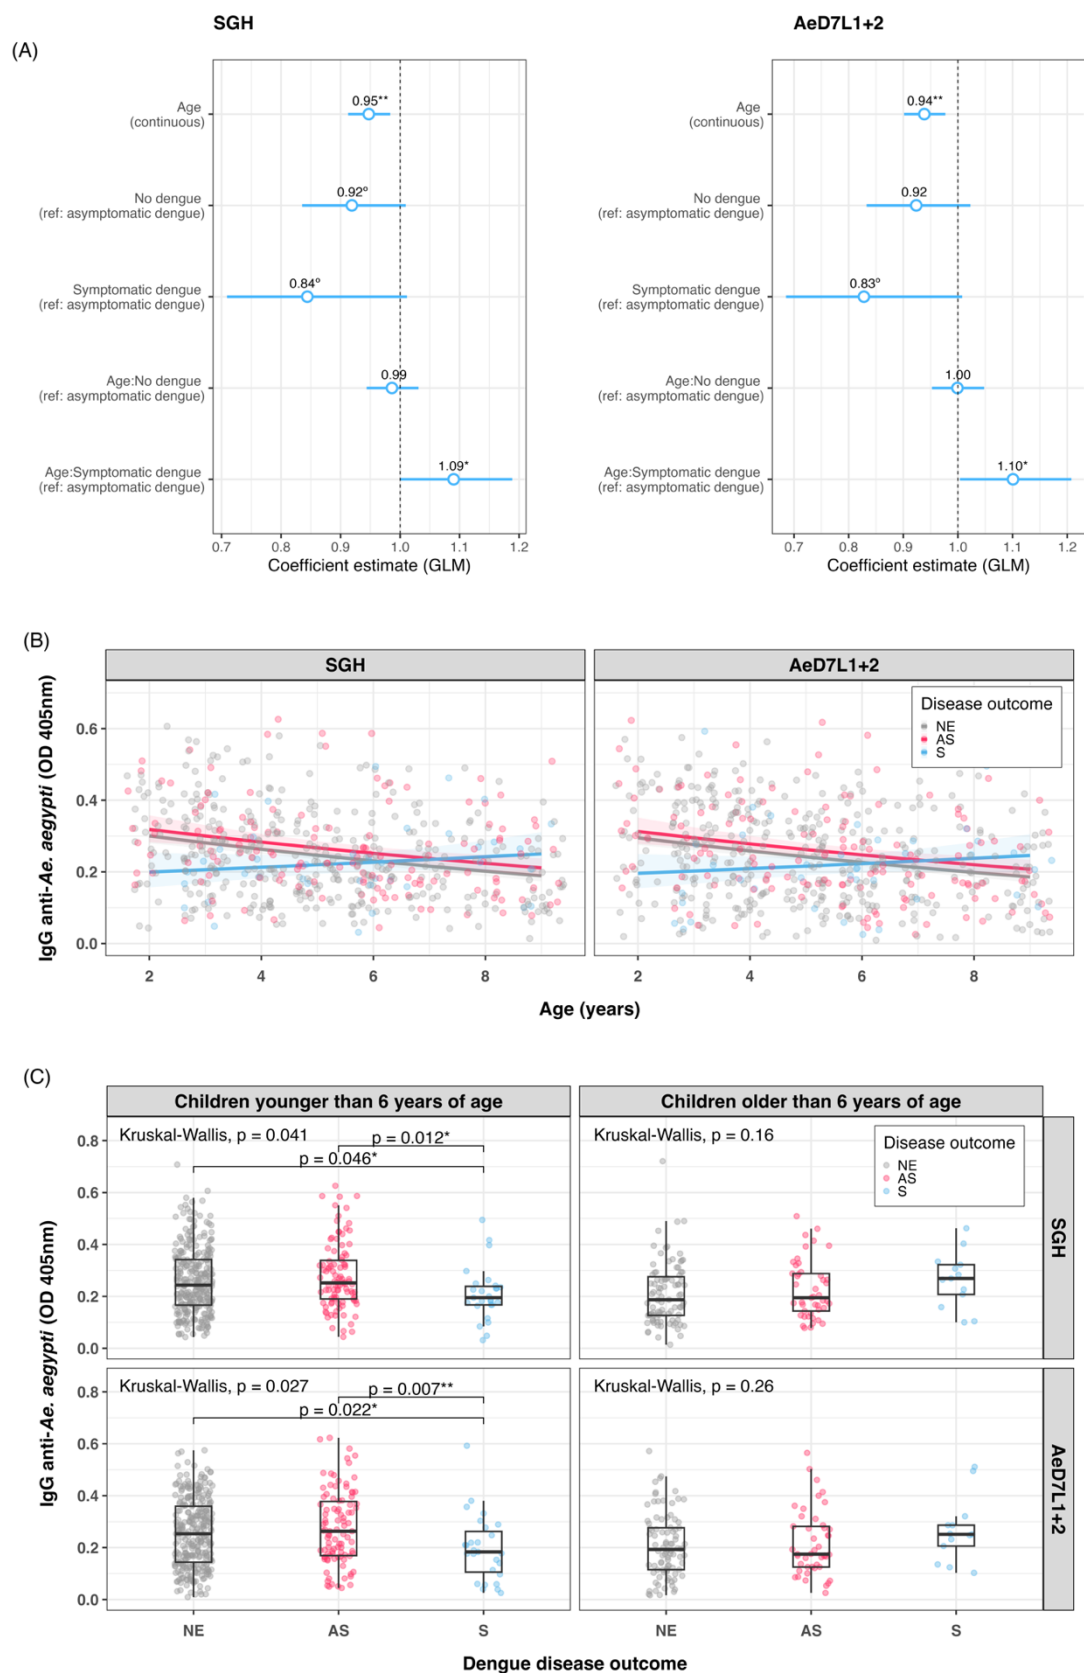

216

217 **Figure 4. Trends in baseline anti-*Ae. aegypti* IgG responses.** (A) Exponentiated  
218 regression coefficient estimates for the generalized linear model fitted to the IgG data per  
219 assay. The circles represent the exponentiated mean coefficient estimate (the value shown  
220 above the corresponding circle). The horizontal lines represent the 95% confidence intervals  
221 of the estimate. The referent group was “asymptomatic” for both disease outcome and the  
222 age × disease outcome interaction term. (B) Scatterplot of standardized ELISA IgG optical  
223 density (OD) values with age at study baseline, for both SGH and AeD7L1+2 (n=563). The  
224 solid lines visualize the marginal effect of the age x disease outcome interaction from the  
225 GLM regression fitted to the antibody data. (C) Dot and boxplots of IgG OD values for SGH  
226 and AeD7L1+2, comparing different dengue disease outcomes for children younger or older  
227 than six years old. The solid black horizontal line within the boxplots is the median; the lower  
228 and upper borders are, respectively, the 1st and 3rd quartiles; the vertical bars indicate the  
229 minimum and maximum values. Results of the overall Kruskal-Wallis test and the post-hoc  
230 Dunn’s test for pairwise comparisons are provided. GLM = Generalized Linear Model; OD =  
231 Optical Density; NE = No Event; AS = Asymptomatic dengue; S = Symptomatic dengue;  
232 SGH = Salivary Gland Homogenate. Significance levels \*\*\*  $P < 0.001$ ; \*\*  $P < 0.01$ ; \*  $P < 0.05$ ; °  
233  $P < 0.1$ .

234

235

### 236 **3.5 Antibody reactivity to AeD7L1+2 recombinant salivary proteins is** 237 **specific to *Aedes* mosquitoes.**

238

239 Since Cambodians are exposed to the bites of several hematophagous insects  
240 during their life, we tested for potential cross-reactions between AeD7L1+2 proteins  
241 and salivary proteins from other mosquito species abundant in our study area using  
242 an inhibition immunoblot assay. We incubated SGH from *Ae. albopictus*, *Cx.*  
243 *quinquefasciatus*, and *An. dirus* with a pool of Cambodian sera reactive to *Ae.*  
244 *aegypti* SGH and observed recognition of several salivary proteins at diverse  
245 molecular weights, including the ones respective to AeD7L1+2 (Fig 5A, left panel).  
246 We then incubated the sera pool with AeD7L1+2 recombinant proteins, to absorb  
247 AeD7L1+2 specific Abs. The sera reactivity at 28-38 kDa (corresponding to the MW  
248 of AeD7L1 and AeD7L2 proteins) was lost for both *Ae. aegypti* and *Ae. albopictus*  
249 SGH (Fig 5A, right panel). However, the sera remained reactive against a *Cx.*  
250 *quinquefasciatus* SGH protein of equivalent molecular weight, suggesting that  
251 Cambodian children have anti-*Culex* Abs that do not cross-react with AeD7L1+2.

252 This further supports the notion that AeD7L1+2 recombinant proteins are specific to  
253 *Aedes* mosquitoes. Indeed, multiple pairwise alignment of the D7L proteins from *Ae.*  
254 *aegypti*, *Ae. albopictus* and *Cx. quinquefasciatus* shows a high degree of divergence  
255 between species with few conserved areas of identity (Fig. 5B, dark shaded areas).  
256 At the *Aedes* genus, the AeD7L2 protein sequence is 67.85 % identical to the  
257 AlboD7L1 sequence and the AeD7L1 sequence is 71.62 % identical to the AlboD7L2  
258 sequence. Interestingly, AeD7L1 and AeD7L2 protein sequences are only 38.71 %  
259 identical. Similarly, the phylogenetic analysis of the Culicidae confirms clustering of  
260 AeD7L1 with AlboD7L2, whereas AeD7L2 sequence clustered with AlboD7L1.  
261 Proteins from both *Aedes* species, however, were segregated from *Culex* D7L or  
262 *Anopheles* D7L proteins.  
263

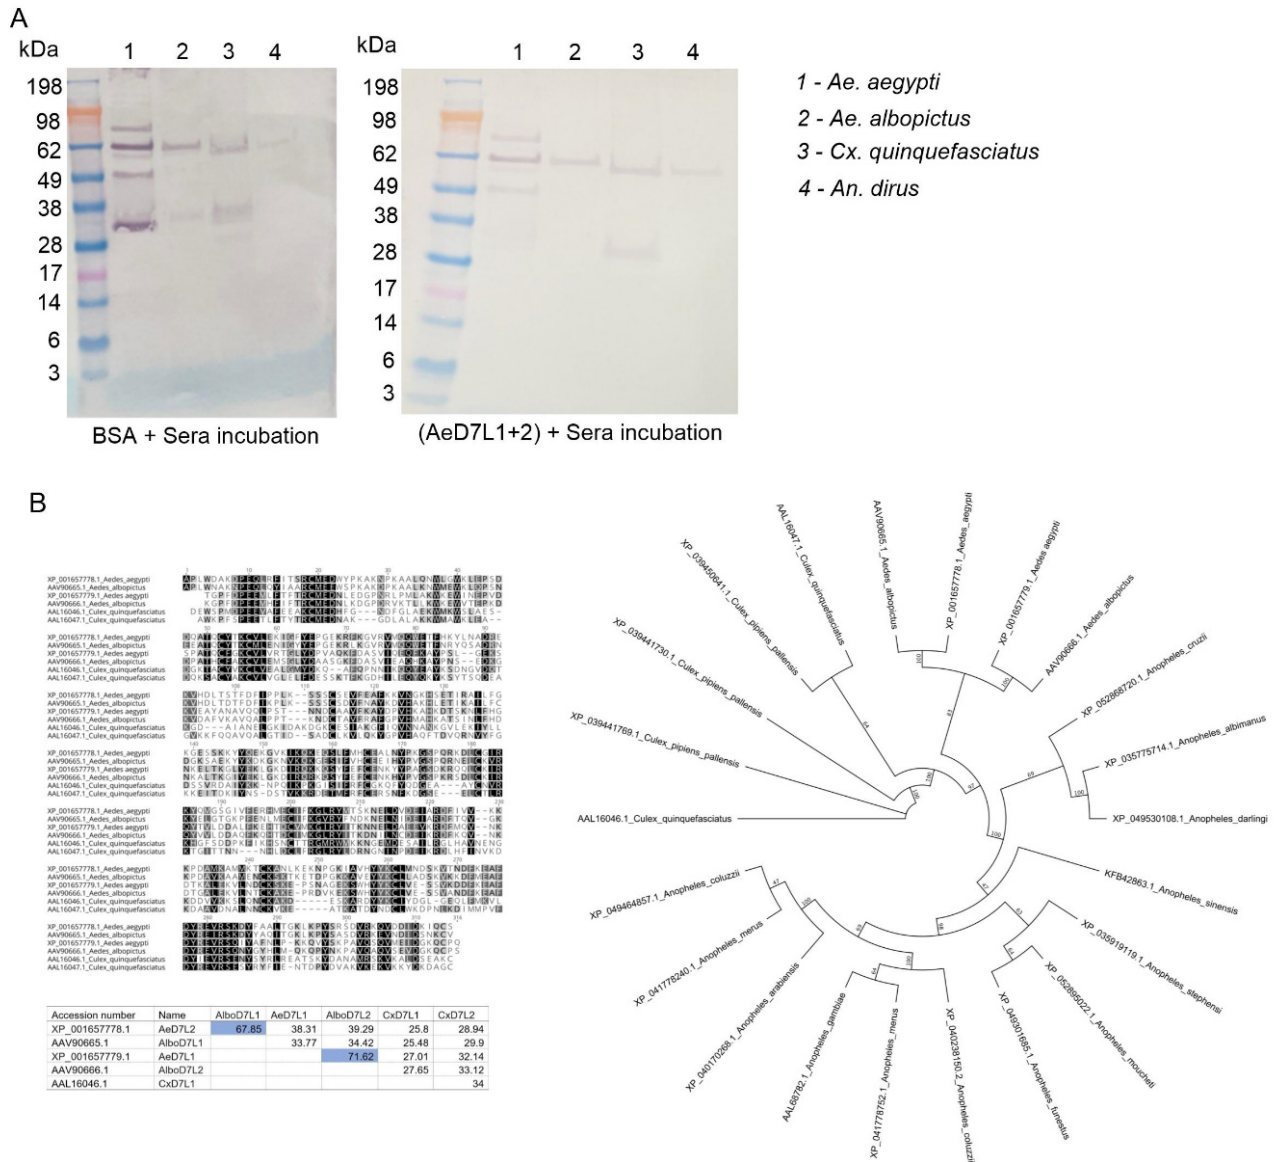

264

265

266 **Figure 5. Specificity of AeD7L1+2 recombinant proteins to Aedes mosquitoes. (A)**

267 Western blots show reactivity of Cambodian sera to SGH of *Ae. aegypti*, *Ae. albopictus*, *Cx.*

268 *quinquefasciatus*, and *An. dirus* without (left) and with (right) pre-incubation with AeD7L1+2

269 recombinant proteins. (B) Multiple alignments of D7L proteins from *Ae. aegypti*, *Ae.*

270 *albopictus*, and *Cx. quinquefasciatus* using MUSCLE. The matrix indicates the percentages

271 of identities between D7L proteins of different species. Color shading indicate percentage

272 identity between sequences, going from 100 % (black) to 0 % identity (white). The

273 evolutionary history was inferred using the Maximum Likelihood method. Evolutionary

274 analyses were conducted in Geneious using the Paup plugin.

275

## 276 4 Discussion

277

278 *Ae. aegypti* SGH ELISAs are a useful tool to measure mosquito exposure (27), but  
279 are costly, laborious, and challenging to standardize between laboratories. Here, we  
280 propose an ELISA to measure Ab responses against recombinant *Ae. aegypti*  
281 D7L1+2 salivary proteins as a surrogate for monitoring human exposure to *Ae.*  
282 *aegypti* bites. Our hypothesis relies on measuring a rapid reduction of specific IgG  
283 Ab levels to AeD7L1+2 when exposure to *Ae. aegypti* is disrupted. *Aedes aegypti*  
284 abundance and dengue incidence are known to fluctuate throughout seasons, as  
285 has been evidenced by entomological indices and previous serosurveys (28, 29). As  
286 a proof of principle, the AeD7L1+2 assay uncovered seasonal weather patterns by  
287 capturing the waxing and waning of IgG Abs levels from dry to rainy season. This  
288 assay This assay utilizes recombinant proteins, thereby forgoing reliance on  
289 insectary maintenance and manual salivary gland dissection and enabling  
290 standardization through a can be performed in a high throughput and cost-effective  
291 platform and it could be assessed through a simple finger prick. It can be employed  
292 to identify hot spots areas with high biting rates (30) or evaluate the effectiveness of  
293 vector control methods (31-33), which could then inform allocation of scarce public  
294 health resources to areas with a high risk of *Aedes*-borne disease transmission.  
295 More so, having an accurate estimate of population exposure to *Aedes* mosquitoes  
296 will help raise community awareness and might encourage residents in high-risk  
297 areas to take protective measures (27).

298

299 The D7 subfamily of salivary proteins are widely present across the order of  
300 bloodsucking Diptera (34) and likely regulate hemostasis by scavenging biogenic  
301 amines and leukotrienes, which are small molecules that play essential roles in  
302 inflammation, allergy, vascular permeability, and vascular tone (35). Indeed, salivary  
303 AeD7L knock-out mosquitoes required longer probing times than WT *Ae. aegypti*,  
304 confirming its importance on blood feeding (36). The D7L is known to be  
305 immunogenic in humans (37) and may serve as potential exposure markers for *An.*  
306 *gambiae* (38). Entomological parameters estimating *Ae. aegypti* density are  
307 associated with SGH Ab responses substantiating its use as a reference standard for  
308 the identification of new exposure markers (9). For the first time, this study formally

309 correlates side-by-side paired responses to distinct *Ae. aegypti* salivary proteins to  
310 the whole *Ae. aegypti* SGH. Our unbiased screening approach provides the  
311 confidence that AeD7L1+2 assay is well suited to substitute *Ae. aegypti* SGH in  
312 ELISAs. The Abs to AeD7L1+2 seem to recognize both *Ae. aegypti* and *Ae.*  
313 *albopictus*, serving as an *Aedes* generic exposure tool with no detected cross-  
314 reactivity to *Cx. quinquefasciatus* or *An. dirus* mosquitoes SGH, a likely advantage to  
315 SGH assays, where the risk of cross-reactivity may be higher. These reactivity  
316 patterns are explained by the high sequence identity of D7L salivary proteins within  
317 the *Aedes* genus and their high degree of divergence compared to D7L salivary  
318 proteins from *Culex* or *Anopheles* species. Deploying this *Aedes* sp. tool can be  
319 advantageous for arboviral studies since both *Ae. albopictus* and *Ae. aegypti*  
320 effectively transmit many of the same viruses (39, 40). In certain occasions,  
321 however, specific information may be required to evaluate if the focus of  
322 transmission is more urban (*Ae. aegypti*) or rather in forested areas (*Ae. albopictus*).  
323 Our AeD7L1+2 assay could then be complemented with novel species-specific, yet  
324 less sensitive, specific salivary protein ELISAs.

325 Using our three-year longitudinal pediatric cohort study (41), we show that IgG Ab  
326 levels against AeD7L1+2 are higher in naïve children younger than six years who  
327 developed asymptomatic (primary) dengue than those who developed symptomatic  
328 (primary) dengue. This observation may allude to a protective effect of AeD7L Abs in  
329 dengue disease outcomes. However, we were unable to replicate this association  
330 when including person-time at-risk in the analysis, highlighting the complexity of this  
331 “DENV – *Aedes* salivary proteins – anti-saliva Abs” triad. It has been shown that  
332 DENV-infected individuals have significantly higher Ab titers against total *Ae. aegypti*  
333 SGH than controls [3; 7; 12; 35]. Similarly, IgG levels against the Nterm-34 kDa and  
334 AgBR1 were higher in dengue patients without warning signs than in those with  
335 dengue with warning signs [10]. However, Abs against the Nterm-34kDa peptide  
336 were not able to retrospectively identify individuals who developed DENV infection  
337 (14) and in Colombia no statistically significant differences were found when  
338 comparing antibodies to D7L between febrile DENV-negative, non-febrile DENV-  
339 negative or DENV-positive subjects (17), underscoring the uniqueness of each  
340 salivary protein and their distinct role in disease transmission. In the mosquito  
341 salivary glands, AeD7L abundance is upregulated during DENV infection and AeD7L

342 is believed to bind DENV directly forming proteins complexes (42). Interestingly,  
343 AeD7L inhibited DENV infection in a human monocyte cell line and in vivo in a  
344 mouse model (42). The role of AeD7L1+2 Abs in infection adds further complexity to  
345 the DENV establishment in humans from endemic areas. AeD7L1+2 Abs may bind  
346 to D7 during transmission and help neutralize D7-DENV complexes leading to  
347 reduction in viral dissemination and primary asymptomatic dengue. However, the  
348 neutralization capacity and the quality of AeD7L1+2 Abs from our dengue  
349 asymptomatic versus symptomatic subjects on D7-DENV complexes remains to be  
350 tested.

351 We acknowledge that more data are needed to validate the performance of the  
352 AeD7L1+2 assay in other populations. To expedite universal application of the  
353 AeD7L1+2 assay we are committed to openly share the AeD7L1+2 recombinant  
354 proteins with other research groups. The AeD7L1+2 proteins used in our assay are  
355 stable when kept refrigerated after a four-month testing period, with only a minor  
356 decay at room temperature. This supports their simple deployment in resource-  
357 scarce settings, especially when developed into a quantitative lateral flow assay  
358 which will in turn overcome the need for expensive equipment, such as an ELISA  
359 reader spectrophotometer, and inter-laboratory standardization. A limiting factor of  
360 our assay is the lack of a seropositivity cutoff, which is challenging to define given  
361 that most Cambodians are under constant *Ae. aegypti* biting pressure. Additionally,  
362 we did not study other Ab isotypes or IgG subclasses but focused on IgG responses  
363 given their abundance and robustness in freeze-and-thaw cycles (43-45). Future  
364 mechanistic studies would benefit from in-depth investigations into the humoral and  
365 cellular immune response to *Ae. aegypti* saliva to gain understanding of how  
366 AeD7L1+2 Abs impact dengue disease outcome. Knowing the rate at which AeD7L  
367 Abs decay after disrupting mosquito-human contact will be critical to optimize its use  
368 as an epidemiological tool. Abs against saliva of several vector species, including  
369 *Ae. aegypti*, are known to decline with age (11, 46-51). Yet, how these dynamics  
370 impact dengue disease outcome is not well understood. Discerning these age trends  
371 will be crucial when factoring them into the design of future studies. Overall, bridging  
372 these gaps will contribute to a more nuanced understanding of the interplay between  
373 immunity and *Aedes*-borne diseases and expose potential strategies for their  
374 prevention and control.



375 The highly sensitive and *Aedes*-specific novel AeD7L1+2 exposure assay will be  
376 useful in advancing the epidemiological understanding of *Aedes*-borne diseases. Our  
377 assay will encourage and facilitate the standardization of future serosurveys and  
378 epidemiological studies by its ability to provide a robust estimation of human-  
379 mosquito contact in a high-throughput fashion.

## 380 **5 Material and methods**

381

### 382 **5.1 Study population and sample selection**

383

384 The samples selected for the present study originate from the PAGODAS  
385 longitudinal cohort study conducted in Cambodia, of which study protocol and results  
386 are reported elsewhere (18, 41). In brief, children enrolled in the study (2–9 years  
387 old) were followed up every six months for a period of three years to assess their  
388 immune status against dengue and *Ae. aegypti* saliva. Children were considered  
389 dengue naïve at study baseline if they were negative on the PanBio Dengue Indirect  
390 IgG enzyme-linked immunosorbent assay (ELISA), or, when ELISA positive, they  
391 were negative for the presence of DENV-specific neutralizing antibodies (Abs)  
392 (n=563). During the follow up period, 41 children developed symptomatic dengue as  
393 confirmed by RT-PCR for DENV 1–4. Children who seroconverted via pan-DENV  
394 ELISA screening with a corresponding increase in DENV 1-4 neutralization Ab titers  
395 over the threshold value of 1:40 at one of the semiannual visits, and who had not  
396 reported fever-like symptoms during active febrile surveillance, were considered to  
397 have had asymptomatic dengue (n=173).

398 For the present study, a random sample of baseline-dengue naïve children, stratified  
399 by quartiles of anti-SGH Ab response levels (i.e., high, medium, low), were selected  
400 for the initial immunogenicity screening of *Ae. aegypti* salivary proteins by Western  
401 blotting (n = 102). Ab responses against five identified salivary antigens and  
402 combinations thereof were then measured in a random subset of samples collected  
403 at all seven visits from 18 baseline-dengue naïve children (n=126) to investigate  
404 correlations with the Ab response against whole SGH, and to evaluate the  
405 seasonality of these Ab responses. Associations between anti-salivary protein Abs  
406 and disease outcome (i.e., no dengue infection, symptomatic disease, or  
407 asymptomatic disease) were assessed and correlations confirmed using all baseline-

408 dengue naïve samples (n=563). Negative controls were selected from National  
409 Institutes of Health (NIH) Clinical Center (CC) blood donor samples that were non-  
410 reactive against *Ae. aegypti* saliva (n = 10), positive controls were selected from  
411 human sera samples with high reactivity against *Ae. aegypti* SGH, as defined by  
412 ELISA, and stored at the International Centre of Excellence in Research laboratory.  
413

## 414 5.2 Ethics

415  
416 The study protocol was approved by the institutional review boards (IRB) at the US  
417 National Institutes of Health and the National Ethics Committee on Human Research  
418 (NECHR) in Cambodia. The parents or guardians of all pediatric participants  
419 provided signed informed consent to participate in the study (ClinicalTrials.gov  
420 identifier: NCT03534245). Sera from healthy U.S. blood donors were collected  
421 following signed informed consent from participants in the National Institutes of  
422 Health Clinical Center IRB-approved protocol entitled *Collection and Distribution of*  
423 *Blood Components from Healthy Donors for In Vitro Research Use*  
424 (ClinicalTrials.gov identifier: NCT00001846).  
425

## 426 5.3 Mosquito rearing, dissection, and salivary gland homogenization

427  
428 *Ae. aegypti* (Kampong Speu strain, Cambodia and Liverpool strain, Rockville, MD),  
429 *Ae. albopictus* (Phnom Penh strain, Cambodia), *Cx. quinquefasciatus* (Phnom Penh  
430 strain, Cambodia), and *An. dirus* (Mondulkiri strain, Cambodia) mosquitoes were  
431 reared in a controlled environment insectary at the National Center for Parasitology,  
432 Entomology and Malaria Control (Cambodia) under a 12-h light-dark cycle, at 26° C,  
433 and 75 % relative humidity. *Ae. aegypti* Rockefeller strain was reared under the  
434 same conditions at the Laboratory of Malaria and Vector Research (National  
435 Institutes of Health, U.S.). Larvae were fed with fish food (Tetra, USA) every 2 days  
436 until pupae development, while adults were offered 10 % sucrose solution, *ad*  
437 *libitum*. Salivary glands from females 7 – 10 days post-eclosion were dissected  
438 under a stereomicroscope at one gland per microliter of sterile 1 x phosphate-  
439 buffered saline (PBS), pH 7.4 (Thermo Scientific) and stored at –80° C. Prior to use,  
440 salivary glands were disrupted through ultrasonication, and supernatant collected  
441 after removal of insoluble debris by centrifugation at 14,000 rpm for 5 min at 4° C.

442

#### 443 5.4 Production of recombinant *Ae. aegypti* salivary proteins

444

445 The human cell line HEK293 was used to recombinantly express 18 *Ae. aegypti*  
446 recombinant proteins, as described previously (Valenzuela-Leon et al., 2022). After  
447 identification of the most immunogenic proteins, we scaled up the production of  
448 AeApyrase, AeD7L1, AeD7L2, NIH-23, and NIH-27 and codon-optimized them for  
449 mammalian expression, synthesized with a carboxyl-terminal HIS-tag (GenScript)  
450 and cloned into pHEK293 Ultra Expression Vectors (Takara). The SAIC Advanced  
451 Research Facility (Frederick, MD) then transfected the EXPI293F human cells and  
452 recombinantly expressed the proteins. Proteins were purified from the cell culture  
453 supernatant using AmMag Ni Magnetic beads (GenScript) and the AmMag Wand  
454 D12 (GenScript), following manufacturer's instructions. Proteins dialysis was  
455 performed overnight with sterile PBS (Lonza) using 10K MWCO Slide-A-Lyzer  
456 Dialysis Cassettes (Thermo Scientific). The BCA Protein Assay Kit (Pierce) was  
457 used to quantify the protein concentration, after which SDS-PAGE was performed  
458 using NuPAGE Novex 4–12 % Bis-Tris gradient protein gels (Thermo Fisher  
459 Scientific) to assess the quality of the purified proteins. Proteins were visualized with  
460 Coomassie G-250 (SimplyBlue SafeStain, Invitrogen) using the eStain protein  
461 staining device (GenScript), following manufacturer's instructions.

462

#### 463 5.5 Enzyme-linked immunosorbent assay

464

465 Total anti-*Ae. aegypti* SGH IgG was measured by performing ELISAs as adapted  
466 from our previously described protocol (18). In brief, 96-well Immulon plates were  
467 coated with either *Ae. aegypti* SGH (2 µg/ml, Kampong Speu strain) or our *Ae.*  
468 *aegypti* recombinant salivary proteins (5 µg/ml) diluted in carbonate-bicarbonate  
469 buffer (pH 9.6) and incubated overnight at 4° C. Plates were blocked with 200 µl of  
470 TBST/BSA 4 % for 1 hour at RT and incubated with sera (diluted 1:200) for 2 hours  
471 at RT. Plates were washed three times with TBST. Secondary anti-human IgG Abs  
472 conjugated to alkaline phosphatase were added at a concentration of 1:10,000,  
473 diluted in TBST-BSA 4 % (Millipore-Sigma A1543), and incubated for 1 hour at RT.  
474 After six washes, Alkaline Phosphatase Yellow (pNPP) substrate was added, and  
475 absorbance read at 450 nm within 30 minutes. Sera samples were tested in

476 duplicate and retested if the coefficient of variation was above 20 %. The optical  
477 density (OD) value of the blank control, included in each plate, was subtracted from  
478 the raw sample OD values. The same set of positive and negative control samples  
479 was included in each plate (per antigen) to allow for inter-plate standardization (i.e.,  
480  $OD_{\text{sample}} / (OD_{\text{positive control}} - OD_{\text{negative control}})$ ).

481

## 482 5.6 Western blot

483

484 Western blot experiments were performed to identify the most immunogenic *Ae.*  
485 *aegypti* salivary proteins. In brief, 50 µg of *Ae. aegypti* SGH (Rockefeller strain) or 5  
486 µg of recombinant proteins were denatured at 70° C for 10 minutes under non-  
487 reducing conditions and loaded into one 2D well (NuPAGE™ 4 – 12 % Bis-Tris Gel,  
488 Thermo Fisher Scientific) or in each lane of a 10-well gel (Bolt™ 4 – 12 % Bis-Tris  
489 Plus, Thermo Fisher Scientific), respectively. Proteins were separated by SDS-  
490 PAGE at 200 V for 40 min. The proteins were transferred to a 0.45 µm nitrocellulose  
491 membrane (Thermo Fisher Scientific) and blocked with 5 % nonfat dried milk  
492 dissolved in Tris-buffered saline with 0.05 % Tween 20 (TBST–5 % milk) (Sigma) at  
493 4° C overnight. The next day, the membrane was incubated with sera samples  
494 (diluted 1:200) in TBST–5 % milk. Samples were either individually loaded in the  
495 mini-protean II multiscreen apparatus (Bio-Rad) (i.e., for the initial immunogenicity  
496 screening of whole SGH) or pooled and transferred to hybridization bags (Kapak  
497 SealPAK, ProAmpac) (i.e., to verify the immunogenicity of the five identified  
498 proteins). After a 2-hour incubation at RT, the membranes were incubated for 1 hour  
499 at RT with secondary alkaline phosphatase-conjugated goat anti-human IgG heavy  
500 and light chains (IgG H+L; diluted at 1:10,000) (SIGMA). Between each phase,  
501 membranes were washed three times for five minutes with TBST. The chromogenic  
502 reaction was initiated with Alkaline Phosphatase Western Blue® Stabilized Substrate  
503 (Promega) and stopped with distilled water after approximately 10 to 15 minutes.  
504 Images were captured using a KwikQuant Digital Western Blot Detection System  
505 (Kindle Biosciences). Kindle Biosciences' KwikQuant Image Analyzer software was  
506 used to analyze images and to identify reactive protein bands. For the Western blot  
507 inhibition assay, we first quenched all *Aedes* specific antibodies by incubating the

508 pooled sera with 5 µg of both recombinant AeD7L1 and AeD7L2 in hybridization  
509 bags overnight at RT prior to incubation with the membrane.

510

## 511 5.7 Phylogenetic analysis

512

513 The sequences of the salivary D7 long form proteins from *Ae. aegypti*, *Ae. albopictus*  
514 and *Cx. quinquefasciatus* were aligned after removal of their predicted signal peptide  
515 sequence (52). Multiple sequence alignment and identity/similarity matrices were  
516 constructed in Geneious v2022.1.1 using the MUSCLE algorithm (53) and the  
517 PAM200 scoring matrix. Homologues of AeD7L1 and AeD7L2 were identified in the  
518 Non-Redundant (NR) protein database and the Transcriptome Shotgun Assembly  
519 (TSA) database using the Basic Local Alignment Search Tool (54). Mosquitoes with  
520 the most homologous sequences to *Ae. aegypti* (based on their E-value) were  
521 selected. The unrooted evolutionary tree was then constructed with PAUP 4.0 (55)  
522 in Geneious v2022.1.1, following the maximum likelihood procedure of the WAG  
523 amino acid substitution matrix model. The partial deletion option was applied for  
524 gaps/missing data. The reliability of the trees was tested by the bootstrap method  
525 (n=1,000).

526

## 527 5.8 Statistical analysis

528

529 Normality of OD values was assessed by visual inspection of their distribution and  
530 formally tested using the Shapiro-Wilk test. A Kruskal-Wallis rank test was used to  
531 test for differences among > 2 groups (for non-parametric inferences), with a post-  
532 hoc Dunn's test. A Friedman rank test with a post-hoc Conover-Iman test was used  
533 to test for differences among more than two paired groups. Multiple comparisons  
534 were adjusted using the Benjamini-Hochberg procedure. The Kendall W was used  
535 as a measure of the Friedman test effect size. Changes in immune responses with  
536 age and disease outcome were tested by fitting generalized linear models (GLM) to  
537 the Ab values, where a gamma distribution and log-link function gave the best fit by  
538 log-likelihood goodness-of-fit statistics. An age and disease outcome interaction term  
539 was included in the model, with age treated as a mean-centered continuous variable.  
540 Correlations between anti-SGH and anti-recombinant protein IgG responses were  
541 estimated by the Pearson method to investigate a linear relationship between both

542 responses ( $r$ ), and by the Spearman's rank method to assess monotonic  
543 relationships ( $r_s$ ). Cox proportional hazards (PH) models were used to model time to  
544 any dengue infection (in days), comparing those with high vs. low Ab responses at  
545 baseline, and controlling for sex, age, insecticide use, larvicide use, bed net use,  
546 mosquito coil use, school attendance, socio-economic status, and number of toilets  
547 around the house. To fit the Cox PH models, Ab responses were categorized as high  
548 or low based on a cutoff established using tertiles of Ab responses: 'high' is defined  
549 as the middle and highest tertiles, 'low' as the lowest tertile. All statistical analyses  
550 were performed in R Statistical Software (56), and graphical representations created  
551 using the 'ggplot2' and the 'corrplot' package in R (57, 58).  
552

### 553 **Data availability statement**

554 The raw data supporting this article can be found in the supplementary files, Further  
555 inquiries can be directed to the corresponding author.

### 556 **Ethics statement**

557 The study protocol was approved by the institutional review boards (IRB) at the US  
558 National Institutes of Health and the National Ethics Committee on Human Research  
559 (NECHR) in Cambodia. The parents or guardians of all pediatric participants  
560 provided signed informed consent to participate in the study (ClinicalTrials.gov  
561 identifier: NCT03534245). Sera from NIH CC blood donors were collected following  
562 signed informed consent from participants in the National Institutes of Health Clinical  
563 Center IRB-approved protocol entitled *Collection and Distribution of Blood*  
564 *Components from Healthy Donors for In Vitro Research Use* (protocol number: 99-  
565 CC-0168; ClinicalTrials.gov identifier: NCT00001846).

## 566 **Author contributions**

567 FO, SC, LW, JGV, JEM, CY, CL, RL, and RH conceptualized the study. SC, LW, SN,  
568 PL, KT, JO, RSC, AP, DK, SL, RS performed experiments and discussed data.  
569 PCVL and EC discussed data and provided reagents. FO, SC and LW performed  
570 data analysis. FO, SC, LW wrote the manuscript. All authors contributed to the article  
571 and approved the submitted version.

## 572 **Funding**

573 This research was supported by the Intramural Research Program of the National  
574 Institute of Allergy and Infectious Diseases at the National Institutes of Health  
575 (Rockville, USA)

## 576 **Acknowledgments**

577 We thank the participating children and their parents in Chbar Mon, Kampong Speu.  
578 We appreciate the continuous support and collaboration from the provincial health  
579 department and hospital directors of Kampong Speu province. Additionally, we  
580 commend the clinical staff of Kampong Speu District Referral Hospital for their  
581 outstanding patient care in this project.

## 582 **Conflict of interest**

583 The authors declare that the research was conducted in the absence of any  
584 commercial or financial relationships that could be construed as a potential conflict of  
585 interest.

586

## 587 References

588

- 589 1. Bhatt S, Gething PW, Brady OJ, Messina JP, Farlow AW, Moyes CL, Drake JM, Brownstein JS,  
590 Hoen AG, Sankoh O, Myers MF, George DB, Jaenisch T, Wint GR, Simmons CP, Scott TW,  
591 Farrar JJ, Hay SI. 2013. The global distribution and burden of dengue. *Nature* 496:504-7.
- 592 2. Tian N, Zheng JX, Guo ZY, Li LH, Xia S, Lv S, Zhou XN. 2022. Dengue Incidence Trends and Its  
593 Burden in Major Endemic Regions from 1990 to 2019. *Trop Med Infect Dis* 7.
- 594 3. WHO. 2023. Dengue and severe dengue, on World Health Organisation.  
595 <https://www.who.int/news-room/fact-sheets/detail/dengue-and-severe-dengue>. Accessed  
596 4. Alied M, Nguyen D, Abdul Aziz JM, Vinh DP, Huy NT. 2023. Dengue fever on the rise in  
597 Southeast Asia. *Pathog Glob Health* 117:1-2.
- 598 5. Ribeiro JM. 1987. Role of saliva in blood-feeding by arthropods. *Annu Rev Entomol* 32:463-  
599 78.
- 600 6. Dhawan R, Kumar M, Mohanty AK, Dey G, Advani J, Prasad TS, Kumar A. 2017. Mosquito-  
601 Borne Diseases and Omics: Salivary Gland Proteome of the Female *Aedes aegypti* Mosquito.  
602 *OMICS* 21:45-54.
- 603 7. Chowdhury A, Modahl CM, Misse D, Kini RM, Pompon J. 2021. High resolution proteomics of  
604 *Aedes aegypti* salivary glands infected with either dengue, Zika or chikungunya viruses  
605 identify new virus specific and broad antiviral factors. *Sci Rep* 11:23696.
- 606 8. Schneider CA, Calvo E, Peterson KE. 2021. Arboviruses: How Saliva Impacts the Journey from  
607 Vector to Host. *Int J Mol Sci* 22.
- 608 9. Londono-Renteria B, Cardenas JC, Cardenas LD, Christofferson RC, Chisenhall DM, Wesson  
609 DM, McCracken MK, Carvajal D, Mores CN. 2013. Use of anti-*Aedes aegypti* salivary extract  
610 antibody concentration to correlate risk of vector exposure and dengue transmission risk in  
611 Colombia. *PLoS One* 8:e81211.
- 612 10. Mathieu-Daudé F, Claverie A, Plichart C, Boulanger D, Mphande FA, Bossin HC. 2018. Specific  
613 human antibody responses to *Aedes aegypti* and *Aedes polynesiensis* saliva: A new  
614 epidemiological tool to assess human exposure to disease vectors in the Pacific. *PLOS*  
615 *Neglected Tropical Diseases* 12.
- 616 11. Doucoure S, Mouchet F, Cournil A, Le Goff G, Cornелиe S, Roca Y, Giraldez MG, Simon ZB,  
617 Loayza R, Misse D, Flores JV, Walter A, Rogier C, Herve JP, Remoue F. 2012. Human antibody  
618 response to *Aedes aegypti* saliva in an urban population in Bolivia: a new biomarker of  
619 exposure to Dengue vector bites. *Am J Trop Med Hyg* 87:504-10.
- 620 12. Doucoure S, Mouchet F, Cornелиe S, DeHecq JS, Rutee AH, Roca Y, Walter A, Herve JP, Misse  
621 D, Favier F, Gasque P, Remoue F. 2012. Evaluation of the human IgG antibody response to  
622 *Aedes albopictus* saliva as a new specific biomarker of exposure to vector bites. *PLoS Negl*  
623 *Trop Dis* 6:e1487.
- 624 13. Doucoure S, Cornелиe S, Patramool S, Mouchet F, Demettre E, Seveno M, Dehecq JS, Rutee H,  
625 Herve JP, Favier F, Misse D, Gasque P, Remoue F. 2013. First screening of *Aedes albopictus*  
626 immunogenic salivary proteins. *Insect Mol Biol* 22:411-23.
- 627 14. Ndille EE, Dubot-Peres A, Doucoure S, Mouchet F, Cornелиe S, Sidavong B, Fournet F, Remoue  
628 F. 2014. Human IgG antibody response to *Aedes aegypti* Nterm-34 kDa salivary peptide as an  
629 indicator to identify areas at high risk for dengue transmission: a retrospective study in  
630 urban settings of Vientiane city, Lao PDR. *Trop Med Int Health* 19:576-80.
- 631 15. Machain-Williams C, Mammen MP, Jr., Zeidner NS, Beaty BJ, Prenni JE, Nisalak A, Blair CD.  
632 2012. Association of human immune response to *Aedes aegypti* salivary proteins with  
633 dengue disease severity. *Parasite Immunol* 34:15-22.
- 634 16. Etienne V, Gallagher A, Christofferson RC, McCracken MK, Cummings DAT, Long MT. 2023.  
635 Antibodies to *Aedes* spp. salivary proteins: a systematic review and pooled analysis.  
636 *Frontiers in Tropical Diseases* 4.



- 637 17. Londono-Renteria BL, Shakeri H, Rozo-Lopez P, Conway MJ, Duggan N, Jaber-Douraki M,  
638 Colpitts TM. 2018. Serosurvey of Human Antibodies Recognizing *Aedes aegypti* D7 Salivary  
639 Proteins in Colombia. *Front Public Health* 6:111.
- 640 18. Manning JE, Chea S, Parker DM, Bohl JA, Lay S, Mateja A, Man S, Nhek S, Ponce A, Sreng S,  
641 Kong D, Kimsan S, Meneses C, Fay MP, Suon S, Huy R, Lon C, Leang R, Oliveira F. 2022.  
642 Development of Inapparent Dengue Associated With Increased Antibody Levels to *Aedes*  
643 *aegypti* Salivary Proteins: A Longitudinal Dengue Cohort in Cambodia. *J Infect Dis* 226:1327-  
644 1337.
- 645 19. Ribeiro JM, Arca B, Lombardo F, Calvo E, Phan VM, Chandra PK, Wikel SK. 2007. An  
646 annotated catalogue of salivary gland transcripts in the adult female mosquito, *Aedes*  
647 *aegypti*. *BMC Genomics* 8:6.
- 648 20. Valenzuela JG, Pham VM, Garfield MK, Francischetti IM, Ribeiro JM. 2002. Toward a  
649 description of the sialome of the adult female mosquito *Aedes aegypti*. *Insect Biochem Mol*  
650 *Biol* 32:1101-22.
- 651 21. Calvo E, Tokumasu F, Marinotti O, Villeval JL, Ribeiro JMC, Francischetti IMB. 2007. *Aegyptin*,  
652 a novel mosquito salivary gland protein, specifically binds to collagen and prevents its  
653 interaction with platelet glycoprotein VI, integrin  $\alpha 2\beta 1$ , and von Willebrand factor. *J*  
654 *Biol Chem* 282:26928-26938.
- 655 22. Calvo E, Mans BJ, Andersen JF, Ribeiro JM. 2006. Function and evolution of a mosquito  
656 salivary protein family. *J Biol Chem* 281:1935-42.
- 657 23. Matthews BJ, Dudchenko O, Kingan SB, Koren S, Antoshechkin I, Crawford JE, Glassford WJ,  
658 Herre M, Redmond SN, Rose NH, Weedall GD, Wu Y, Batra SS, Brito-Sierra CA, Buckingham  
659 SD, Campbell CL, Chan S, Cox E, Evans BR, Fansiri T, Filipovic I, Fontaine A, Gloria-Soria A, Hall  
660 R, Joardar VS, Jones AK, Kay RGG, Kodali VK, Lee J, Lycett GJ, Mitchell SN, Muehling J,  
661 Murphy MR, Omer AD, Partridge FA, Peluso P, Aiden AP, Ramasamy V, Rasic G, Roy S,  
662 Saavedra-Rodriguez K, Sharan S, Sharma A, Smith ML, Turner J, Weakley AM, Zhao Z, Akbari  
663 OS, Black WCt, Cao H, et al. 2018. Improved reference genome of *Aedes aegypti* informs  
664 arbovirus vector control. *Nature* 563:501-507.
- 665 24. Martins M, Ramos LFC, Murillo JR, Torres A, de Carvalho SS, Domont GB, de Oliveira DMP,  
666 Mesquita RD, Nogueira FCS, Maciel-de-Freitas R, Junqueira M. 2021. Comprehensive  
667 Quantitative Proteome Analysis of *Aedes aegypti* Identifies Proteins and Pathways Involved  
668 in *Wolbachia pipientis* and Zika Virus Interference Phenomenon. *Front Physiol* 12:642237.
- 669 25. Wasinpiyamongkol L, Patramool S, Luplertlop N, Surasombatpattana P, Doucoure S,  
670 Mouchet F, Seveno M, Remoue F, Demettré E, Brizard JP, Jouin P, Biron DG, Thomas F, Misse  
671 D. 2010. Blood-feeding and immunogenic *Aedes aegypti* saliva proteins. *Proteomics*  
672 10:1906-16.
- 673 26. Champagne DE, Smartt CT, Ribeiro JM, James AA. 1995. The salivary gland-specific apyrase  
674 of the mosquito *Aedes aegypti* is a member of the 5'-nucleotidase family. *Proc Natl Acad Sci*  
675 *U S A* 92:694-8.
- 676 27. Sagna AB, Kassie D, Couvray A, Adja AM, Hermann E, Riveau G, Salem G, Fournet F, Remoue  
677 F. 2019. Spatial Assessment of Contact Between Humans and *Anopheles* and *Aedes*  
678 Mosquitoes in a Medium-Sized African Urban Setting, Using Salivary Antibody-Based  
679 Biomarkers. *J Infect Dis* 220:1199-1208.
- 680 28. Choi Y, Tang CS, McIver L, Hashizume M, Chan V, Abeyasinghe RR, Iddings S, Huy R. 2016.  
681 Effects of weather factors on dengue fever incidence and implications for interventions in  
682 Cambodia. *BMC Public Health* 16:241.
- 683 29. Wai KT, Arunachalam N, Tana S, Espino F, Kittayapong P, Abeyewickreme W, Hapangama D,  
684 Tyagi BK, Htun PT, Koyadun S, Kroeger A, Sommerfeld J, Petzold M. 2012. Estimating dengue  
685 vector abundance in the wet and dry season: implications for targeted vector control in  
686 urban and peri-urban Asia. *Pathog Glob Health* 106:436-45.

- 687 30. Parker DM, Medina C, Bohl J, Lon C, Chea S, Lay S, Kong D, Nhek S, Man S, Doehl JSP, Leang  
688 R, Kry H, Rekol H, Oliveira F, Minin VM, Manning JE. 2023. Determinants of exposure to  
689 Aedes mosquitoes: A comprehensive geospatial analysis in peri-urban Cambodia. *Acta Trop*  
690 239:106829.
- 691 31. Fustec B, Phanitchat T, Aromseree S, Pientong C, Thaewngongiew K, Ekalaksananan T,  
692 Cerqueira D, Poinsignon A, Elguero E, Bangs MJ, Alexander N, Overgaard HJ, Corbel V. 2021.  
693 Serological biomarker for assessing human exposure to Aedes mosquito bites during a  
694 randomized vector control intervention trial in northeastern Thailand. *PLoS Negl Trop Dis*  
695 15:e0009440.
- 696 32. Elanga Ndille E, Doucoure S, Poinsignon A, Mouchet F, Cornelie S, D'Ortenzio E, DeHecq JS,  
697 Remoue F. 2016. Human IgG Antibody Response to Aedes Nterm-34kDa Salivary Peptide, an  
698 Epidemiological Tool to Assess Vector Control in Chikungunya and Dengue Transmission  
699 Area. *PLoS Negl Trop Dis* 10:e0005109.
- 700 33. Doucoure S, Mouchet F, Cornelie S, Drame PM, D'Ortenzio E, DeHecq JS, Remoue F. 2014.  
701 Human antibody response to Aedes albopictus salivary proteins: a potential biomarker to  
702 evaluate the efficacy of vector control in an area of Chikungunya and Dengue Virus  
703 transmission. *Biomed Res Int* 2014:746509.
- 704 34. Valenzuela JG, Charlab R, Gonzalez EC, de Miranda-Santos IK, Marinotti O, Francischetti IM,  
705 Ribeiro JM. 2002. The D7 family of salivary proteins in blood sucking diptera. *Insect Mol Biol*  
706 11:149-55.
- 707 35. Alvarenga PH, Andersen JF. 2022. An Overview of D7 Protein Structure and Physiological  
708 Roles in Blood-Feeding Nematocera. *Biology (Basel)* 12.
- 709 36. Martin-Martin I, Kojin BB, Aryan A, Williams AE, Molina-Cruz A, Valenzuela-Leon PC,  
710 Shrivastava G, Botello K, Minai M, Adelman ZN, Calvo E. 2023. Aedes aegypti D7 long salivary  
711 proteins modulate blood feeding and parasite infection. *mBio* doi:10.1128/mbio.02289-  
712 23:e0228923.
- 713 37. Oktarianti R, Senjarini K, Hayano T, Fatchiyah F, Aulanni'am. 2015. Proteomic analysis of  
714 immunogenic proteins from salivary glands of Aedes aegypti. *J Infect Public Health* 8:575-82.
- 715 38. Oseno B, Marura F, Ogwang R, Muturi M, Njunge J, Nkumama I, Mwakesi R, Mwai K, Rono  
716 MK, Mwakubambanya R, Osier F, Tuju J. 2022. Characterization of Anopheles gambiae D7  
717 salivary proteins as markers of human-mosquito bite contact. *Parasit Vectors* 15:11.
- 718 39. Leta S, Beyene TJ, De Clercq EM, Amenu K, Kraemer MUG, Revie CW. 2018. Global risk  
719 mapping for major diseases transmitted by Aedes aegypti and Aedes albopictus. *Int J Infect*  
720 *Dis* 67:25-35.
- 721 40. Kraemer MU, Sinka ME, Duda KA, Mylne AQ, Shearer FM, Barker CM, Moore CG, Carvalho  
722 RG, Coelho GE, Van Bortel W, Hendrickx G, Schaffner F, Elyazar IR, Teng HJ, Brady OJ,  
723 Messina JP, Pigott DM, Scott TW, Smith DL, Wint GR, Golding N, Hay SI. 2015. The global  
724 distribution of the arbovirus vectors Aedes aegypti and Ae. albopictus. *Elife* 4:e08347.
- 725 41. Manning JE, Oliveira F, Parker DM, Amaratunga C, Kong D, Man S, Sreng S, Lay S, Nang K,  
726 Kimsan S, Sokha L, Kamhawi S, Fay MP, Suon S, Ruhl P, Ackerman H, Huy R, Wellems TE,  
727 Valenzuela JG, Leang R. 2018. The PAGODAS protocol: pediatric assessment group of dengue  
728 and Aedes saliva protocol to investigate vector-borne determinants of Aedes-transmitted  
729 arboviral infections in Cambodia. *Parasit Vectors* 11:664.
- 730 42. Conway MJ, Londono-Renteria B, Troupin A, Watson AM, Klimstra WB, Fikrig E, Colpitts TM.  
731 2016. Aedes aegypti D7 Saliva Protein Inhibits Dengue Virus Infection. *PLoS Negl Trop Dis*  
732 10:e0004941.
- 733 43. Rastawicki W, Smietanska K, Rokosz N, Jagielski M. 2012. [Effect of multiple freeze-thaw  
734 cycles on detection of IgA, IgG and IgM antibodies to selected bacterial antigens]. *Med Dosw*  
735 *Mikrobiol* 64:79-85.

- 736 44. Pinsky NA, Huddleston JM, Jacobson RM, Wollan PC, Poland GA. 2003. Effect of multiple  
737 freeze-thaw cycles on detection of measles, mumps, and rubella virus antibodies. *Clin Diagn*  
738 *Lab Immunol* 10:19-21.
- 739 45. Shurrab FM, Al-Sadeq DW, Amanullah F, Younes SN, Al-Jighefee H, Younes N, Dargham SR,  
740 Yassine HM, Abu Raddad LJ, Nasrallah GK. 2021. Effect of multiple freeze-thaw cycles on the  
741 detection of anti-SARS-CoV-2 IgG antibodies. *J Med Microbiol* 70.
- 742 46. Peng Z, Ho MK, Li C, Simons FE. 2004. Evidence for natural desensitization to mosquito  
743 salivary allergens: mosquito saliva specific IgE and IgG levels in children. *Ann Allergy Asthma*  
744 *Immunol* 93:553-6.
- 745 47. Oliveira F, Traore B, Gomes R, Faye O, Gilmore DC, Keita S, Traore P, Teixeira C, Coulibaly CA,  
746 Samake S, Meneses C, Sissoko I, Fairhurst RM, Fay MP, Anderson JM, Doumbia S, Kamhawi S,  
747 Valenzuela JG. 2013. Delayed-type hypersensitivity to sand fly saliva in humans from a  
748 leishmaniasis-endemic area of Mali is Th1-mediated and persists to midlife. *J Invest*  
749 *Dermatol* 133:452-9.
- 750 48. Buezo Montero S, Gabrieli P, Montarsi F, Borean A, Capelli S, De Silvestro G, Forneris F,  
751 Pombi M, Breda A, Capelli G, Arca B. 2020. IgG Antibody Responses to the *Aedes albopictus*  
752 34k2 Salivary Protein as Novel Candidate Marker of Human Exposure to the Tiger Mosquito.  
753 *Front Cell Infect Microbiol* 10:377.
- 754 49. Cardenas JC, Drame PM, Luque-Burgos KA, Berrio JD, Entrena-Mutis E, Gonzalez MU,  
755 Carvajal DJ, Gutierrez-Silva LY, Cardenas LD, Colpitts TM, Mores CN, Londono-Renteria B.  
756 2019. IgG1 and IgG4 antibodies against *Aedes aegypti* salivary proteins and risk for dengue  
757 infections. *PLoS One* 14:e0208455.
- 758 50. Montiel J, Carbal LF, Tobon-Castano A, Vasquez GM, Fisher ML, Londono-Renteria B. 2020.  
759 IgG antibody response against *Anopheles* salivary gland proteins in asymptomatic  
760 *Plasmodium* infections in Narino, Colombia. *Malar J* 19:42.
- 761 51. Willen L, Milton P, Hamley JID, Walker M, Osei-Atweneboana MY, Volf P, Basanez MG,  
762 Courtenay O. 2022. Demographic patterns of human antibody levels to *Simulium damnosum*  
763 s.l. saliva in onchocerciasis-endemic areas: An indicator of exposure to vector bites. *PLoS*  
764 *Negl Trop Dis* 16:e0010108.
- 765 52. Almagro Armenteros JJ, Tsirigos KD, Sonderby CK, Petersen TN, Winther O, Brunak S, von  
766 Heijne G, Nielsen H. 2019. SignalP 5.0 improves signal peptide predictions using deep neural  
767 networks. *Nat Biotechnol* 37:420-423.
- 768 53. Edgar RC. 2004. MUSCLE: a multiple sequence alignment method with reduced time and  
769 space complexity. *BMC Bioinformatics* 5:113.
- 770 54. Altschul SF, Gish W, Miller W, Myers EW, Lipman DJ. 1990. Basic local alignment search tool.  
771 *J Mol Biol* 215:403-10.
- 772 55. Wilgenbusch JC, Swofford D. 2003. Inferring evolutionary trees with PAUP\*. *Curr Protoc*  
773 *Bioinformatics* Chapter 6:Unit 6 4.
- 774 56. R Core Team. 2023. R: A language and environment for statistical computing., v4.3.1. R  
775 Foundation for Statistical Computing, <http://www.R-project.org>.
- 776 57. Wickham H. 2016. ggplot2: Elegant Graphics for Data Analysis. Springer-Verlag New York.
- 777 58. Wei T, Simko V. 2021. R package 'corrplot': Visualization of a Correlation Matrix.  
778 <https://github.com/taiyun/corrplot>. Accessed

779

780

781

782

783
