# Supplementary material for: Antibodies to Aedes aegypti D7L salivary proteins as a new serological tool to estimate human exposure to Aedes mosquitoes
Source: bioRxiv or medRxiv preprint supplement (doi:10.1101/2023.12.22.23300438), 2023-12-24
Supplement: Supplementary file [file media-1.pdf]

# Supplementary Material

## **Antibodies to *Aedes aegypti* D7L salivary proteins as a new serological tool to estimate human exposure to *Aedes* mosquitoes.**

Sophana Chea<sup>1†</sup>, Laura Willen<sup>2†</sup>, Sreynik Nhek<sup>1</sup>, Piseth Ly<sup>1</sup>, Kristina Tang<sup>2</sup>, James Oristian<sup>2</sup>, Roberto Salas-Carrillo<sup>2</sup>, Aiyana Ponce<sup>2</sup>, Paola Carolina Valenzuela Leon<sup>2</sup>, Dara Kong<sup>1</sup>, Sokna Ly<sup>2</sup>, Ratanak Sath<sup>2</sup>, Chanthap Lon<sup>1,2</sup>, Rithea Leang<sup>3,4</sup>, Rekol Huy<sup>3</sup>, Christina Yek<sup>1,2</sup>, Jesus G. Valenzuela<sup>2</sup>, Eric Calvo<sup>2</sup>, Jessica E. Manning<sup>1,2</sup>, Fabiano Oliveira<sup>1,2\*</sup>.

<sup>1</sup> International Center of Excellence in Research, National Institute of Allergy and Infectious Diseases, Phnom Penh, Cambodia

<sup>2</sup> Laboratory of Malaria and Vector Research, National Institute of Allergy and Infectious Diseases, National Institutes of Health, Bethesda, MD, USA

<sup>3</sup> National Center for Parasitology, Entomology, and Malaria Control, Ministry of Health, Phnom Penh, Cambodia

<sup>4</sup> National Dengue Control Program, Ministry of Health, Phnom Penh, Cambodia

Sophana Chea<sup>1†</sup> and Laura Willen<sup>2†</sup>: These authors contributed equally to this work and share first authorship.

**Correspondence:** Fabiano Oliveira, loliveira@nih.gov

27 1. Supplementary Figures and Tables

28 a. Supplementary Figures

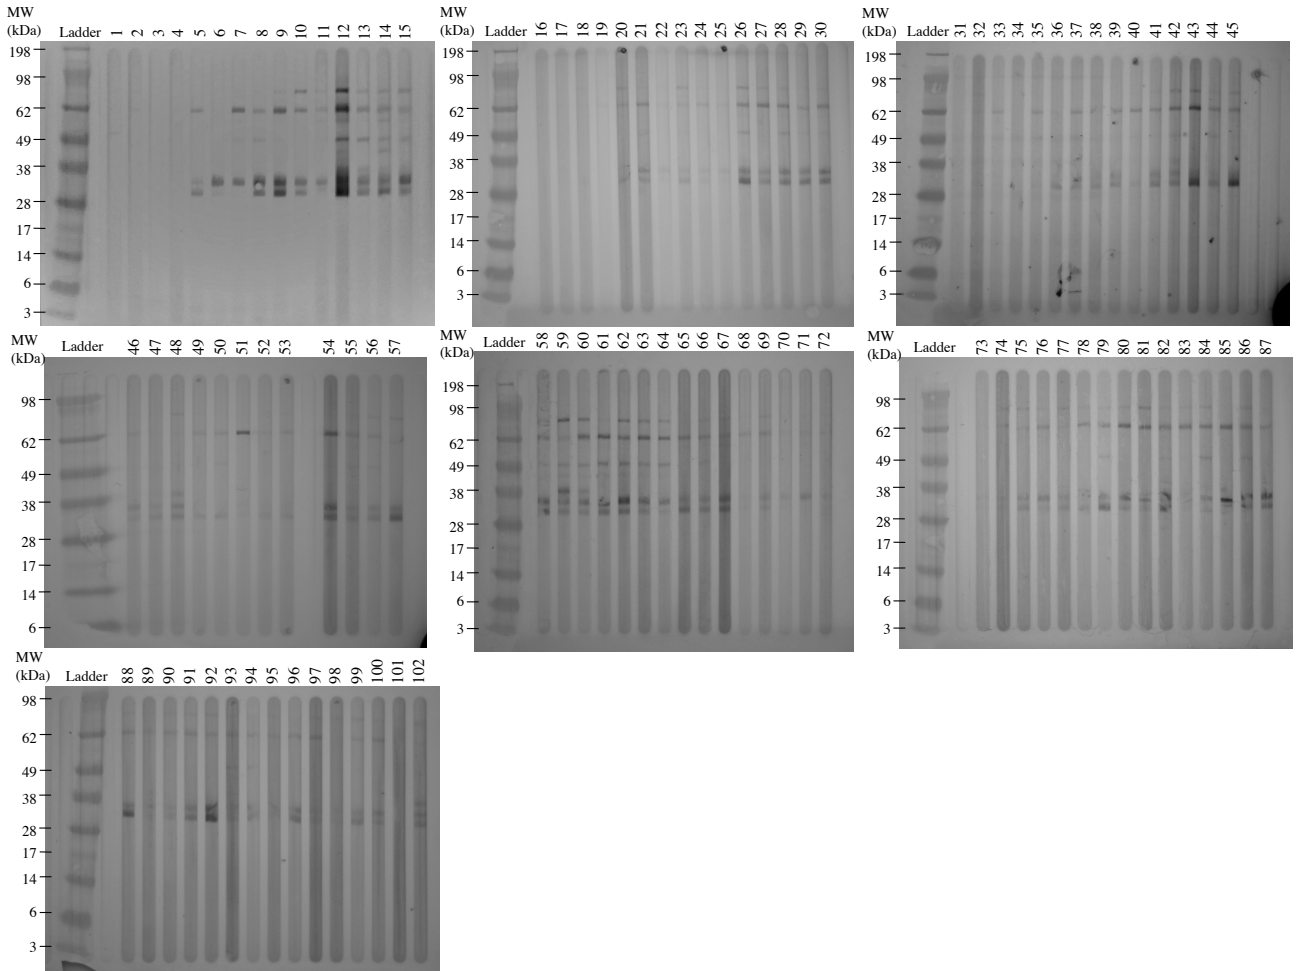

29

30 **Supplementary Figure 1. Western blots for reactivity of Cambodian sera with whole salivary gland**  
31 **homogenate of *Ae. aegypti*.** Each lane represents the serum reactivity of one Cambodian individual with  
32 SGH. MW: Molecular Weight; SGH: Salivary Gland Homogenate.

33

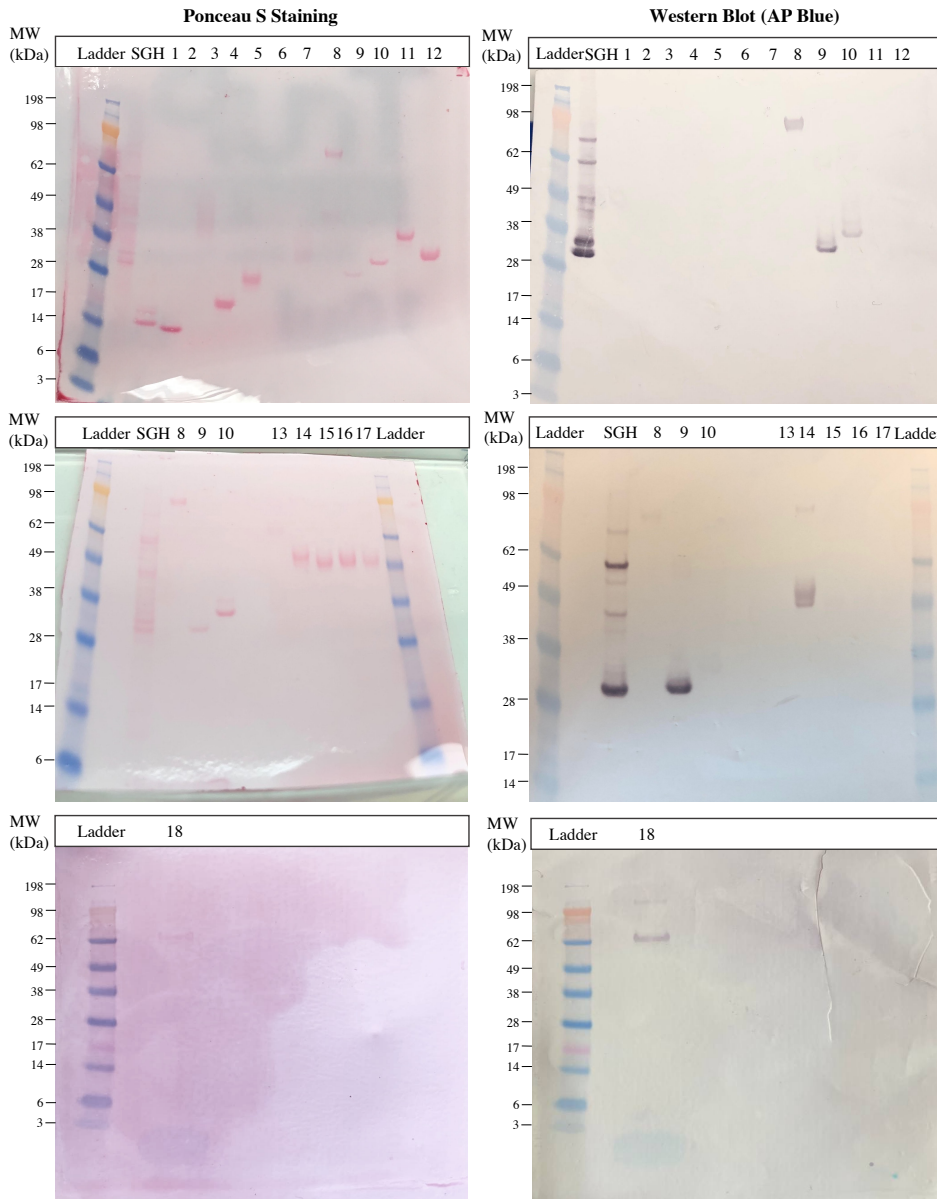

| Lane number | Protein Name | Estimated MW (kDa) |
|-------------|--------------|--------------------|
| 1           | NIH435-36    | 20.05              |
| 2           | NIH435-8     | 20.6               |
| 3           | NIH435-4     | 21                 |
| 4           | NIH435-29    | 21.16              |
| 5           | NIH435-35    | 21.25              |
| 6           | Aegyptin     | 30                 |
| 7           | NIH435-32    | 36.4               |
| 8           | NIH435-27    | 36.7               |
| 9           | AeD7L1       | 37                 |
| 10          | AeD7L2       | 37                 |
| 11          | NIH435-31    | 38.721             |
| 12          | NIH435-24    | 39.13              |
| 13          | NIH435-16    | 20.05              |
| 14          | NIH435-23    | 20.6               |
| 15          | NIH435-19    | 21                 |
| 16          | NIH435-6     | 21.16              |
| 17          | NIH435-21    | 21.25              |
| 18          | AeApyrase    | 61.36              |

34

35

36

37

38

39

40

41

42

**Supplementary Figure 2. Ponceau staining and Western Blot of 17 recombinantly expressed *Ae. aegypti* salivary proteins.** Protein names and their estimated molecular weight are shown in the table. MW: Molecular Weight; SGH: Salivary Gland Homogenate.

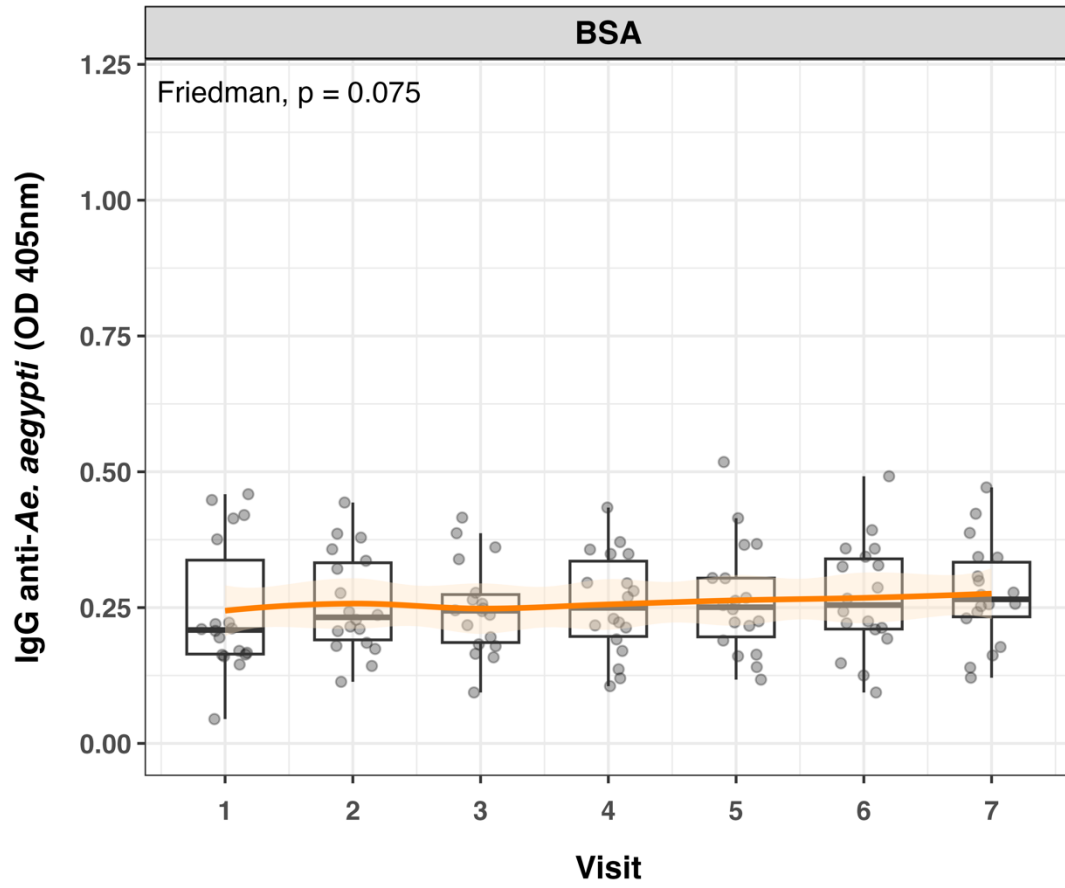

44  
45  
46

**Supplementary Figure 3.** No significant differences were observed for the Ab responses against BSA during the wet and dry seasons.

47

## 48 2. Supplementary Tables

49 **Supplementary Table 1. Correlation coefficients, *p* values and confidence intervals for Pearson and Spearman correlation between SGH and all**  
 50 **tested combinations of *Ae. aegypti* recombinant salivary proteins. BSA: Bovine Serum Albumin; CI: Confidence Interval.**

| Recombinant protein                    | Pearson Correlation |                |                | Spearman Correlation          |                |              |
|----------------------------------------|---------------------|----------------|----------------|-------------------------------|----------------|--------------|
|                                        | Coefficient (r)     | <i>p</i> value | 0.95 CI        | Coefficient (r <sub>s</sub> ) | <i>p</i> value | 0.95 CI      |
| AeD7L1+2                               | 0.91                | 4.26e-049      | 0.87 – 0.94    | 0.92                          | 4.96e-52       | 0.89 – 0.94  |
| AeD7L1                                 | 0.82                | 8.75e-32       | 0.75 – 0.87    | 0.84                          | 1.00e-34       | 0.78 – 0.89  |
| AeD7L2                                 | 0.76                | 5.93e-25       | 0.67 – 0.83    | 0.82                          | 1.70e-31       | 0.75 – 0.87  |
| AeApyrase + AeD7L1+2 + NIH-27 + NIH-23 | 0.81                | 8.24e-31       | 0.74 – 0.86    | 0.87                          | 7.95e-41       | 0.83 – 0.91  |
| AeApyrase + AeD7L1+2 + NIH-27          | 0.84                | 2.12e-34       | 0.78 – 0.88    | 0.90                          | 8.98e-48       | 0.87 – 0.93  |
| AeApyrase + AeD7L1+2 + NIH-23          | 0.79                | 1.46e-27       | 0.71 – 0.84    | 0.85                          | 4.05e-37       | 0.80 – 0.90  |
| AeApyrase + NIH-23 + NIH-27            | 0.72                | 1.68e-21       | 0.625 – 0.7957 | 0.78                          | 2.03e-27       | 0.71 – 0.84  |
| AeD7L1+2 + NIH-27 + NIH-23             | 0.90                | 1.20e-45       | 0.86 – 0.93    | 0.93                          | 1.03e-56       | 0.91 – 0.95  |
| AeD7L1+2 + NIH-27                      | 0.90                | 3.73e-46       | 0.86 – 0.93    | 0.93                          | 1.14e-56       | 0.91 – 0.95  |
| BSA                                    | 0.17                | 0.051          | -0.001 – 0.34  | 0.15                          | 0.10           | -0.03 – 0.31 |

**Supplementary Table 2. Hazard ratios, confidence intervals and *p* values per risk factor tested for dengue seroconversion using Cox regression. *Aedes aegypti* exposure was estimated using anti-SGH antibody levels. SGH: Salivary Gland Homogenate; HR: Hazard Ratio; CI: Confidence interval.**

| <b>Risk factor</b>                                                     | <b>HR [CI]</b>   | <b><i>p</i></b> |
|------------------------------------------------------------------------|------------------|-----------------|
| <b><i>Aedes aegypti</i> SGH salivary protein antibodies (ref: low)</b> |                  |                 |
| <i>High</i>                                                            | 1.3 [0.94-1.79]  | 0.112           |
| <b>Sex (ref: female)</b>                                               |                  |                 |
| <i>Male</i>                                                            | 1.04 [0.78-1.41] | 0.777           |
| <b>Age (per year)</b>                                                  | 1.08 [0.98-1.19] | 0.132           |
| <b>Educational status (ref: in school)</b>                             |                  |                 |
| <i>Not in school</i>                                                   | 0.83 [0.53-1.29] | 0.402           |
| <b>Socioeconomic class (ref: Lower/ very poor)</b>                     |                  |                 |
| <i>Middle/upper</i>                                                    | 0.99 [0.67-1.45] | 0.950           |
| <b>No. of domestic water containers at home</b>                        | 0.10 [0.94-1.06] | 0.927           |
| <b>No. of toilets in the home</b>                                      | 1.18 [0.97-1.42] | 0.094           |
| <b>Use of bednets (ref: rarely/never)</b>                              |                  |                 |
| <i>Regularly/ all of the time</i>                                      | 0.89 [0.57-1.39] | 0.610           |
| <b>Use of insecticide spray (ref: does not use)</b>                    |                  |                 |
| <i>Uses insecticide spray</i>                                          | 0.69 [0.50-0.94] | 0.020           |
| <b>Use of larvicide (ref: applies larvicide to water)</b>              |                  |                 |
| <i>Does not apply larvicide to water</i>                               | 1.22 [0.81-1.83] | 0.349           |
| <b>How often mosquito coils burned (ref: daily/often)</b>              |                  |                 |
| <i>Never</i>                                                           | 1.28 [0.91-1.79] | 0.154           |
| <i>Sometimes/rarely (1-3 times/wk)</i>                                 | 0.75 [0.49-1.16] | 0.195           |

**Supplementary Table 3. Hazard ratios, confidence intervals and *p* values per risk factor tested for dengue seroconversion using Cox regression. *Aedes aegypti* exposure was estimated using anti-D7L1+2 antibody levels. HR: Hazard Ratio; CI: Confidence interval.**

| <b>Risk factor</b>                                                        | <b>HR [CI]</b> | <b><i>p</i></b> |
|---------------------------------------------------------------------------|----------------|-----------------|
| <b><i>Aedes aegypti</i> D7L1+2 salivary protein antibodies (ref: low)</b> |                |                 |
| <i>High</i>                                                               | 1.2 [1.4-0.9]  | 0.341           |
| <b>Sex (ref: female)</b>                                                  |                |                 |
| <i>Male</i>                                                               | 1 [2.4-0.8]    | 0.872           |
| <b>Age (per year)</b>                                                     | 1.1 [1.2-1]    | 0.157           |
| <b>Educational status (ref: in school)</b>                                |                |                 |
| <i>Not in school</i>                                                      | 0.8 [1.5-0.5]  | 0.391           |
| <b>Socioeconomic class (ref: Lower/ very poor)</b>                        |                |                 |
| <i>Middle/upper</i>                                                       | 1 [2.5-0.7]    | 0.914           |
| <b>No. of domestic water containers at home</b>                           | 1 [2.6-0.9]    | 0.972           |
| <b>No. of toilets in the home</b>                                         | 1.2 [1.1-1]    | 0.095           |
| <b>Use of bednets (ref: rarely/never)</b>                                 |                |                 |
| <i>Regularly/ all of the time</i>                                         | 0.9 [1.9-0.6]  | 0.617           |
| <b>Use of insecticide spray (ref: does not use)</b>                       |                |                 |
| <i>Uses insecticide spray</i>                                             | 0.7 [1-0.5]    | 0.020           |
| <b>Use of larvicide (ref: applies larvicide to water)</b>                 |                |                 |
| <i>Does not apply larvicide to water</i>                                  | 1.2 [1.4-0.8]  | 0.285           |
| <b>How often mosquito coils burned (ref: daily/often)</b>                 |                |                 |
| <i>Never</i>                                                              | 1.3 [1.2-0.9]  | 1.365           |
| <i>Sometimes/rarely (1-3 times/wk)</i>                                    | 0.7 [1.2-0.5]  | <0.0001         |
